# Supplementary material for: Mitochondrial ETF insufficiency drives neoplastic growth by selectively optimizing cancer bioenergetics
Source: eLife journal article supplement (doi:10.7554/elife.106587), 2025-05-09
Supplement: fig3-data1 [file Figure 3C - source data 1.pdf › Figure 3 - source data 1/Figure 3C - source data 1/Figure 3C - source data 1.pdf]

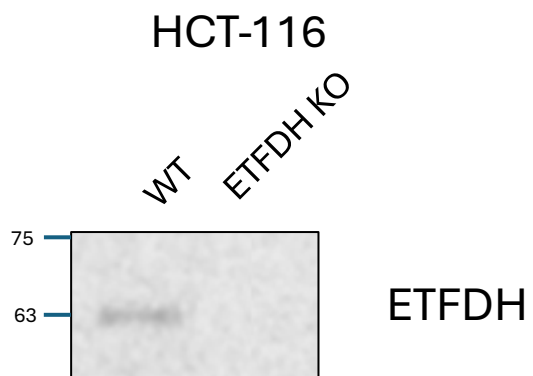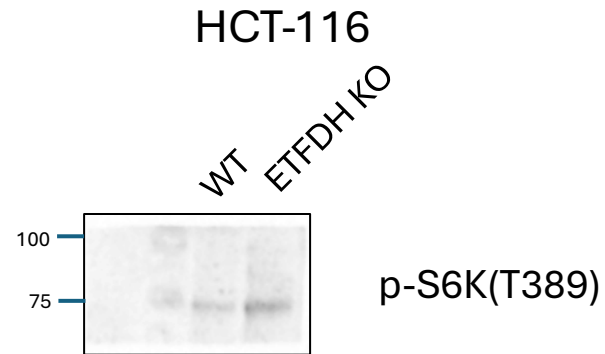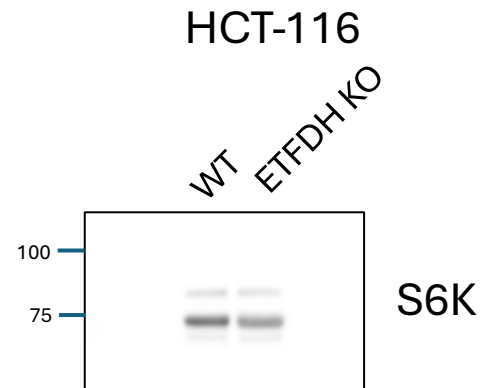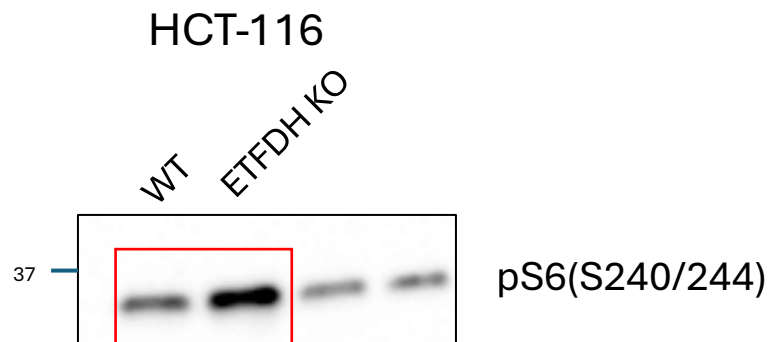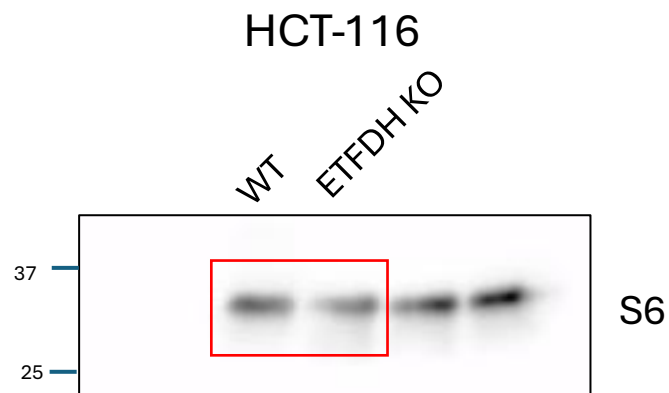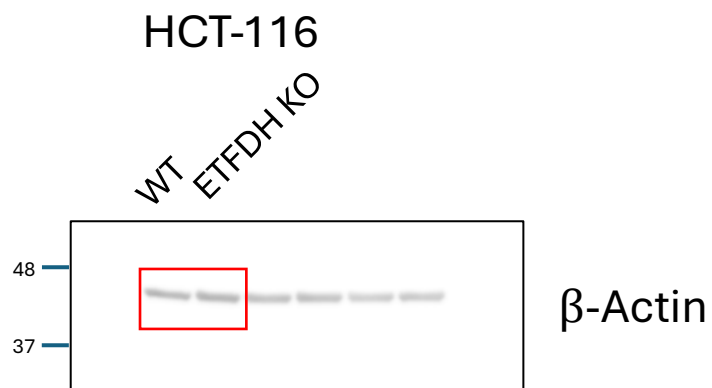

NT2197

WT

ETFDH KO

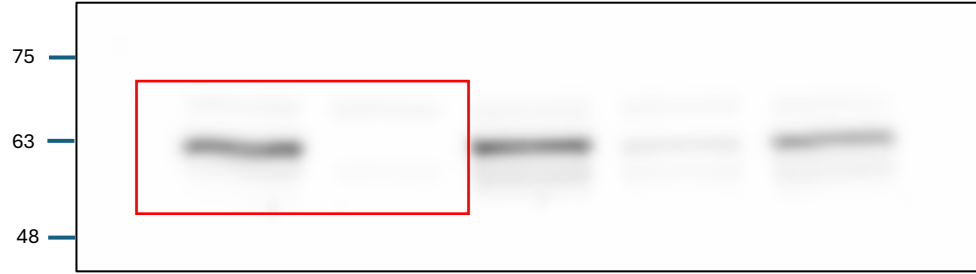

ETFDH

NT2197

WT

ETFDH KO

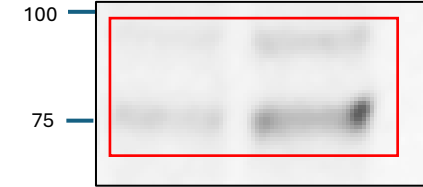

S6K

NT2197

WT

ETFDH KO

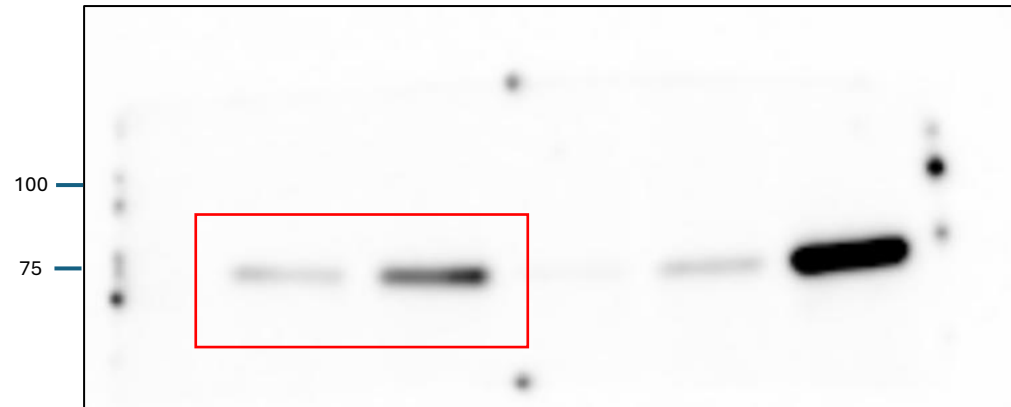

p-S6K(T389)

NT2197

WT

ETFDH KO

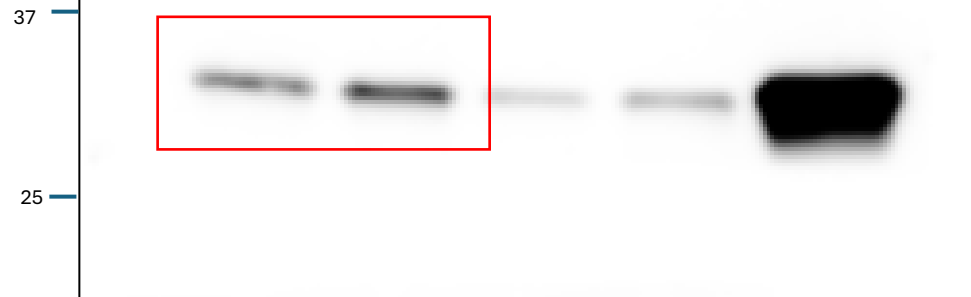

pS6(S240/244)

NT2197

WT

ETFDH KO

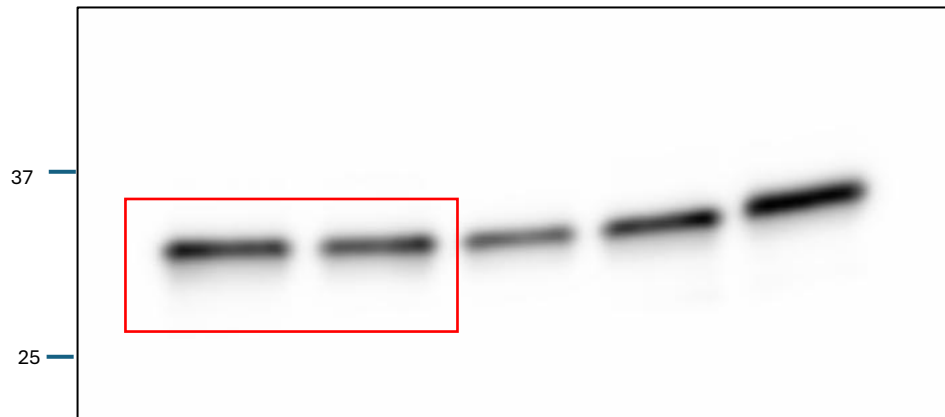

S6

NT2197

WT

ETFDH KO

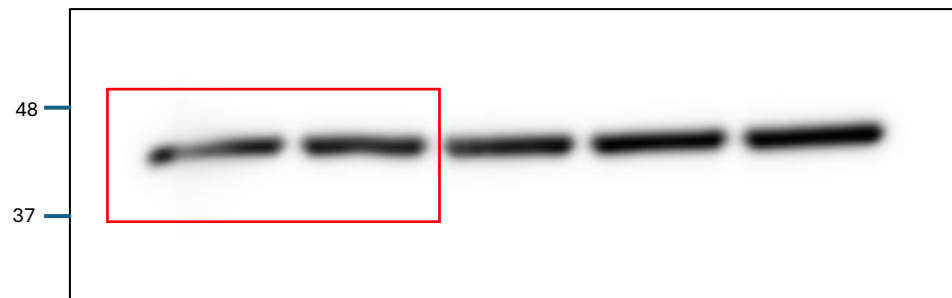

β-Actin
