# Supplementary material for: Mitochondrial ETF insufficiency drives neoplastic growth by selectively optimizing cancer bioenergetics
Source: eLife journal article supplement (doi:10.7554/elife.106587), 2025-05-09

## ETFDH

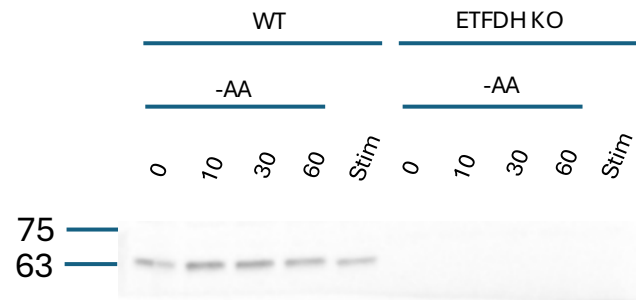

## pS6(S240/244)

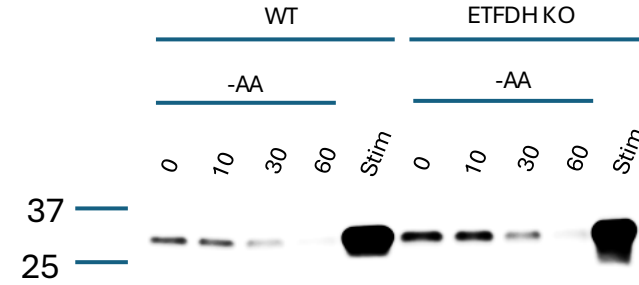

## S6

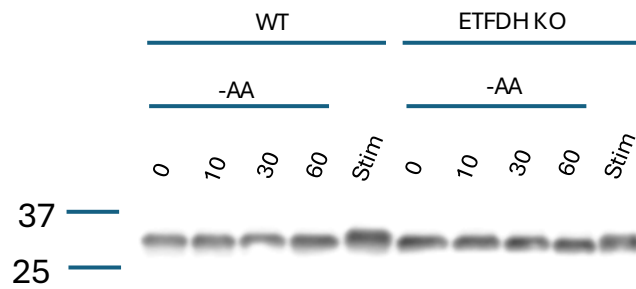

## p-4E-BP1 (S65)

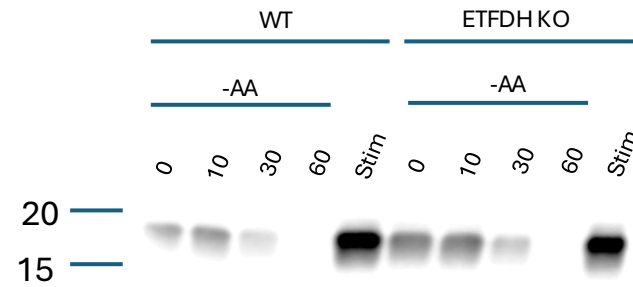

The diagram illustrates the experimental design for two groups: WT and ETFDH KO. For each group, there is a horizontal timeline. A blue bar labeled '-AA' spans from 0 to 60 minutes. Following this, a 'Stim' period is indicated, also spanning from 0 to 60 minutes. The timeline is marked with 0, 10, 30, and 60 minutes.

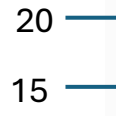

WT

ETFDH KO

-AA

0 10 30 60 Stim

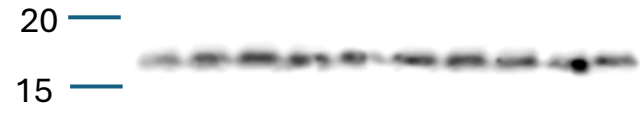

WT

ETFDH KO

-AA

0 10 30 60 Stim

0 10 30 60 Stim

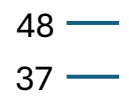

Supplement: fig3-data1 [file Figure 3E - source data 1.pdf › Figure 3 - source data 1/Figure 3E - source data 1/Figure 3E - source data 1.pdf]
