# Supplementary material for: Mitochondrial ETF insufficiency drives neoplastic growth by selectively optimizing cancer bioenergetics
Source: eLife journal article supplement (doi:10.7554/elife.106587), 2025-05-09

HCT-116

WT EV  
ETFDH KO  
ETFDH Rescue

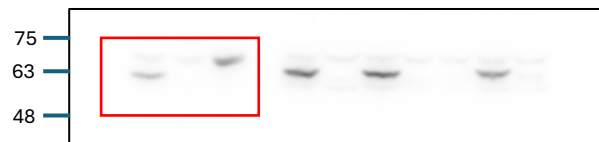

ETFDH

HCT-116

WT EV  
ETFDH KO  
ETFDH Rescue

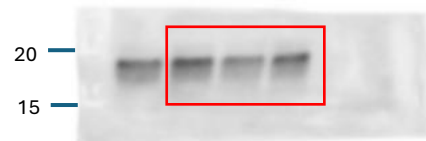

p4E-BP1

HCT-116

WT EV  
ETFDH KO  
ETFDH Rescue

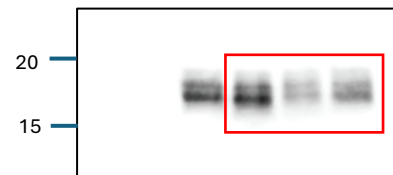

4E-BP1

HCT-116

WT EV  
ETFDH KO  
ETFDH Rescue

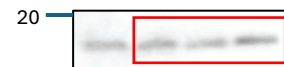

4E-BP2

HCT-116

WT EV  
ETFDH KO  
ETFDH Rescue

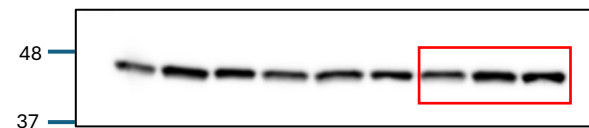

β-Actin

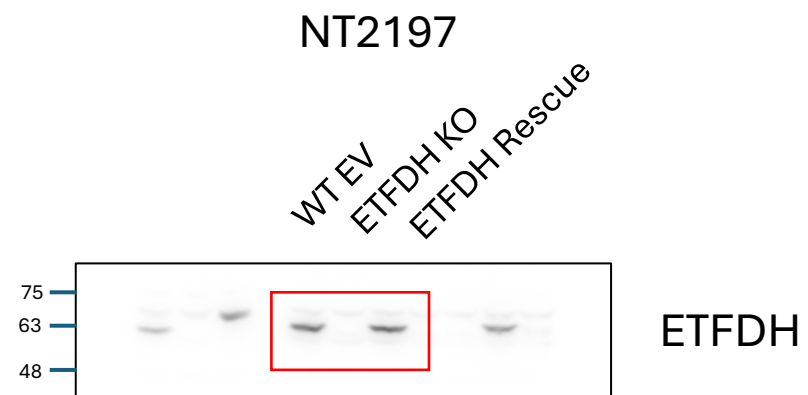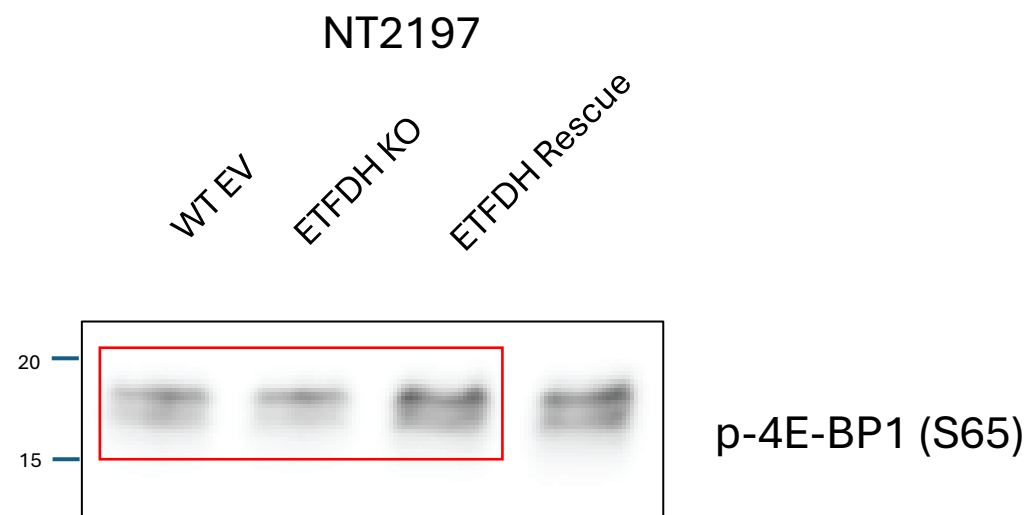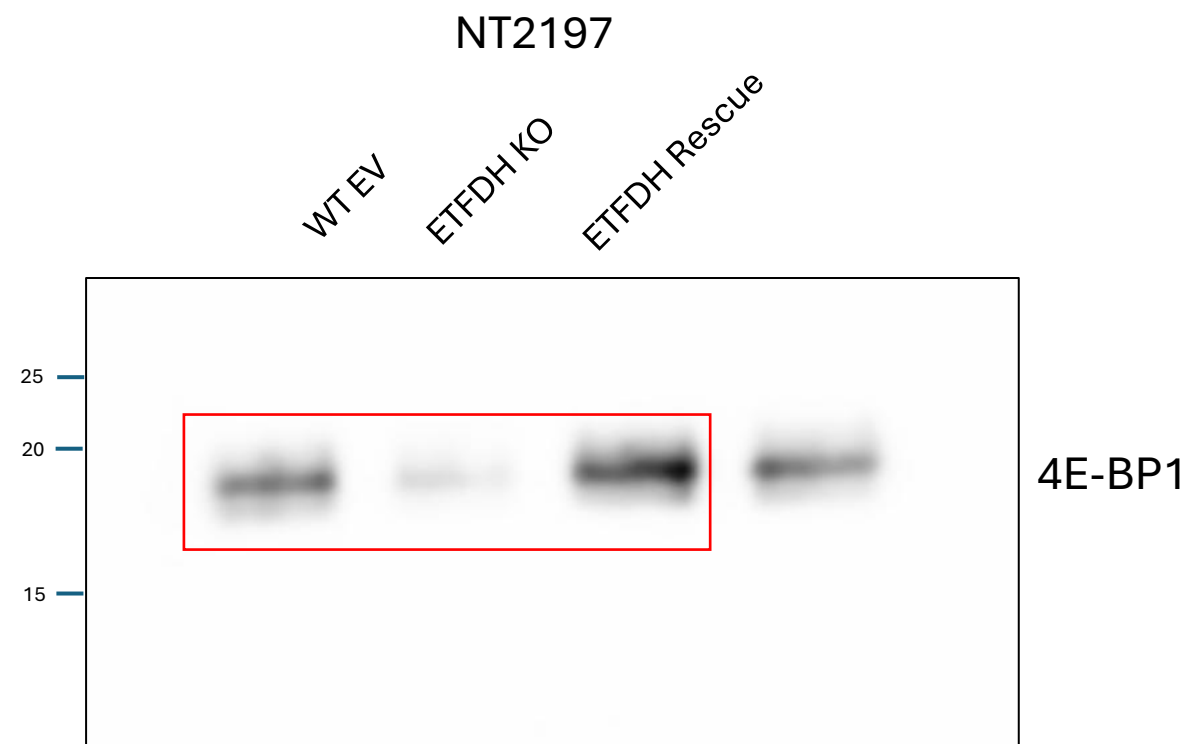

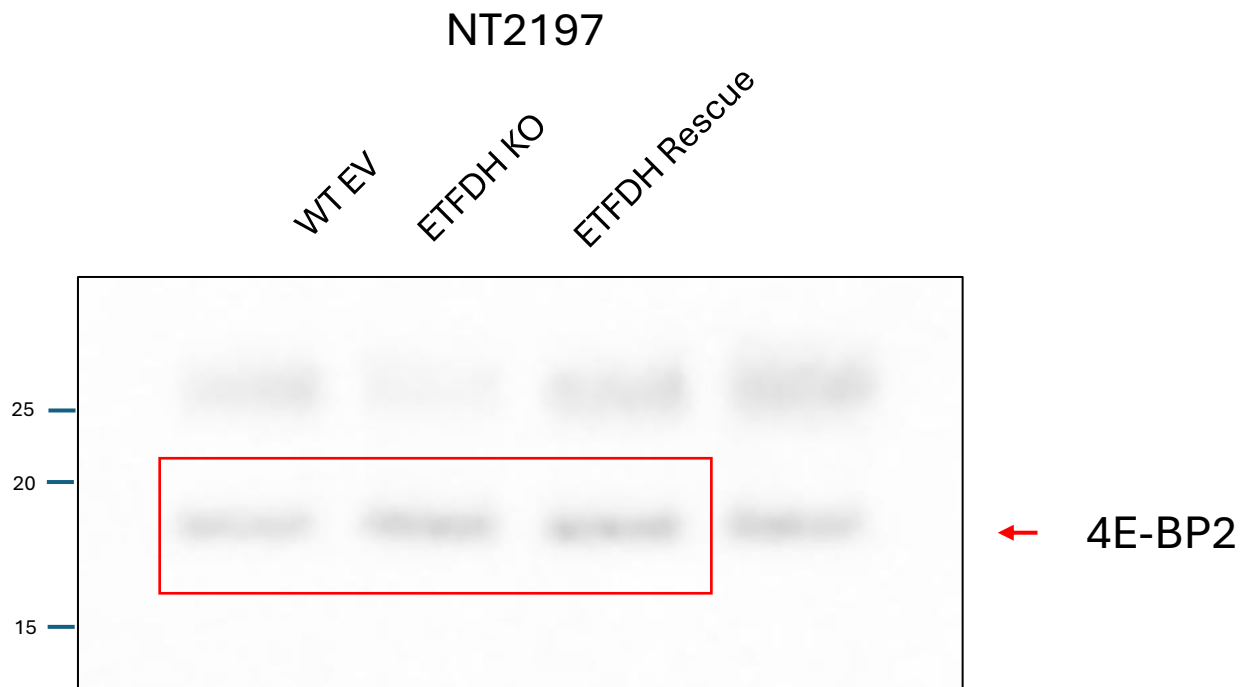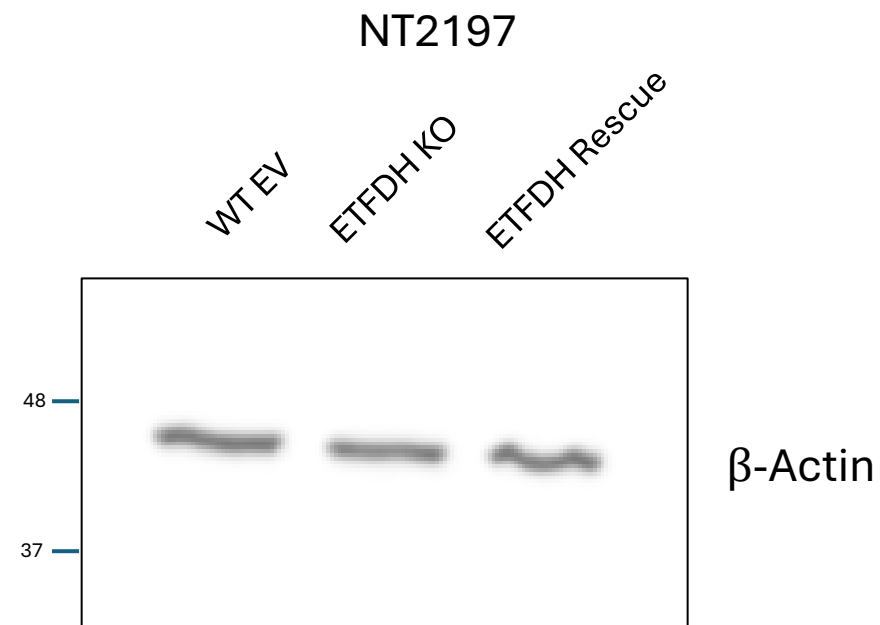

Supplement: fig4-data1 [file Figure 4A - source data 1.pdf › Figure 4 - source data 1/Figure 4A - source data 1/Figure 4A - source data 1.pdf]
