# Supplementary figures and images for: Mitochondrial ETF insufficiency drives neoplastic growth by selectively optimizing cancer bioenergetics
Source: eLife journal article supplement (doi:10.7554/elife.106587), 2025-05-09

HCT-116

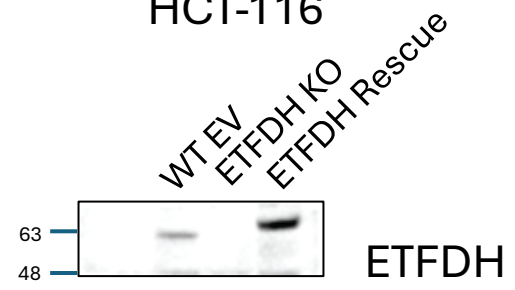

HCT-116

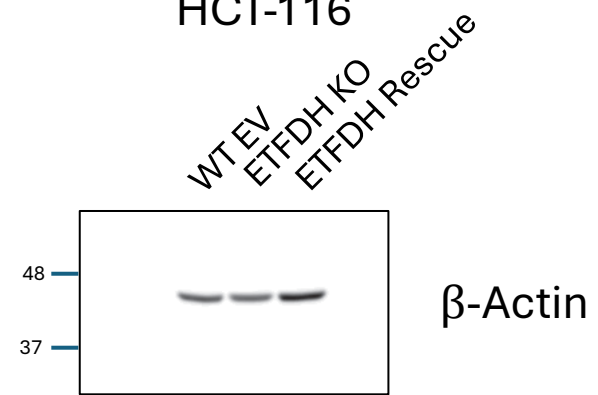

Supplement: fig1-figsupp1-data1 [file Figure 1-figure supplement 1E - source data 1.pdf › Figure 1-figure supplement 1 - source data 1/Figure 1-figure supplement 1E - source data 1/Figure 1-figure supplement 1E - source data 1.pdf]

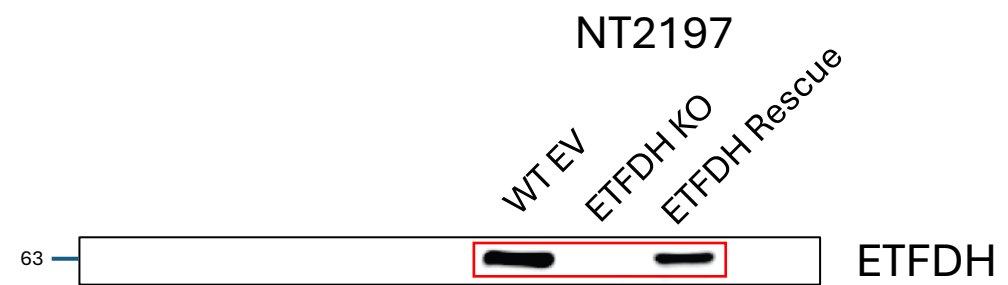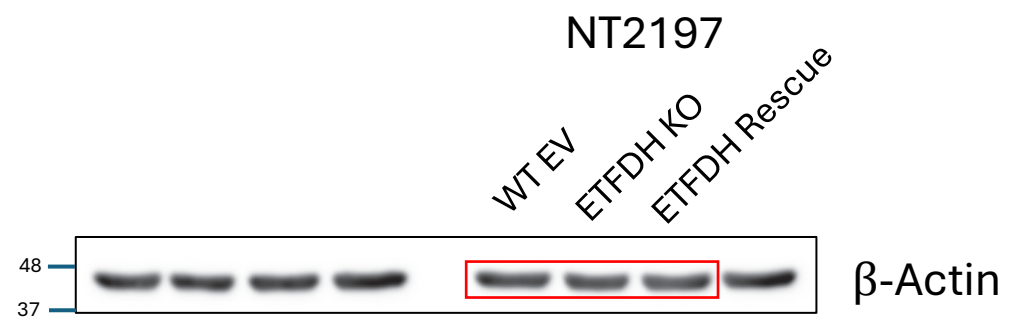

Supplement: fig1-figsupp1-data1 [file Figure 1-figure supplement 1F - source data 1.pdf › Figure 1-figure supplement 1 - source data 1/Figure 1-figure supplement 1F - source data 1/Figure 1-figure supplement 1F - source data 1.pdf]

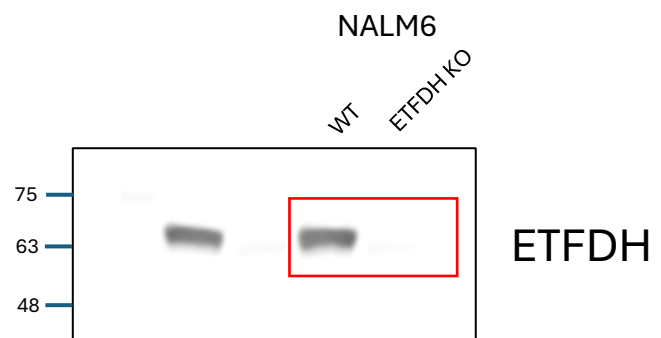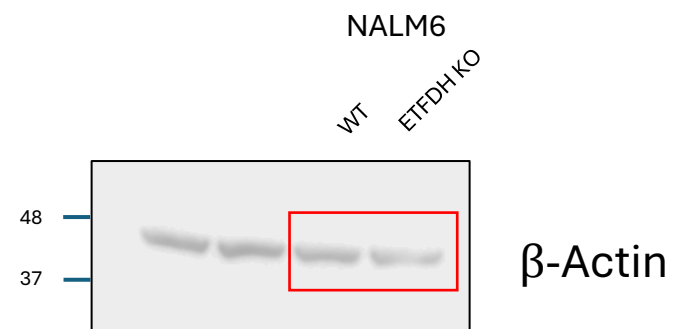

Supplement: fig1-figsupp1-data1 [file Figure 1-figure supplement 1H - source data 1.pdf › Figure 1-figure supplement 1 - source data 1/Figure 1-figure supplement 1H - source data 1/Figure 1-figure supplement 1H - source data 1.pdf]

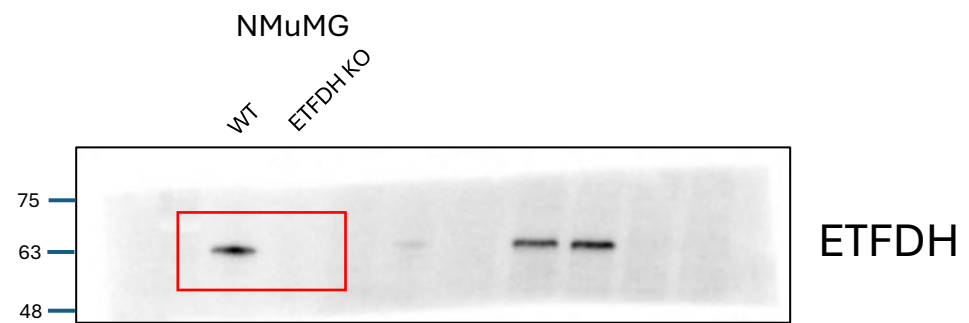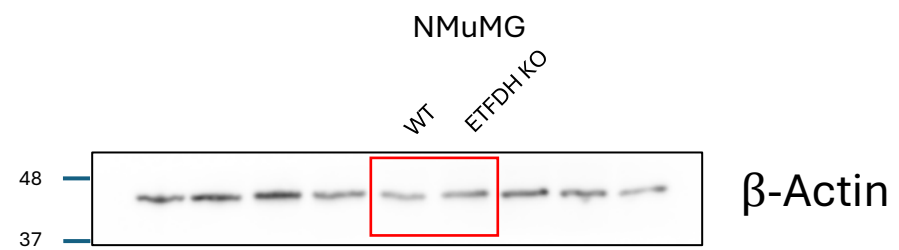

Supplement: fig1-figsupp1-data1 [file Figure 1-figure supplement 1I - source data 1.pdf › Figure 1-figure supplement 1 - source data 1/Figure 1-figure supplement 1I - source data 1/Figure 1-figure supplement 1I - source data 1.pdf]

HCT-116

WT ETFDH KO

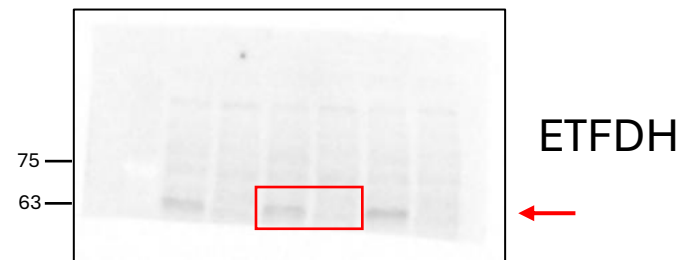

HCT-116

WT ETFDH KO

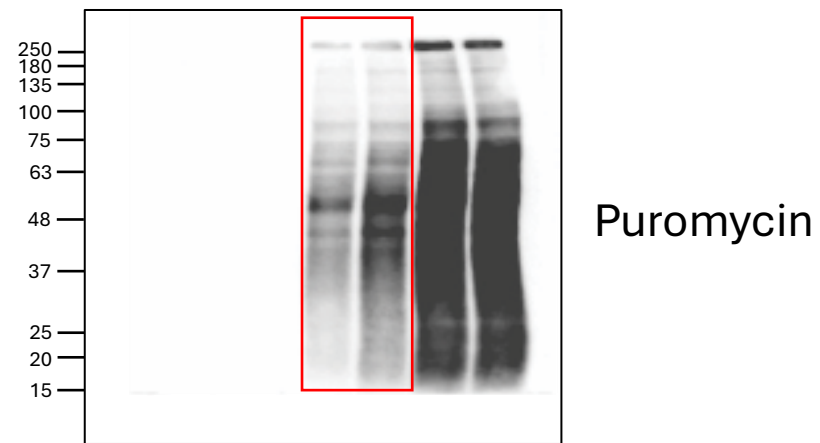

HCT-116

WT ETFDH KO

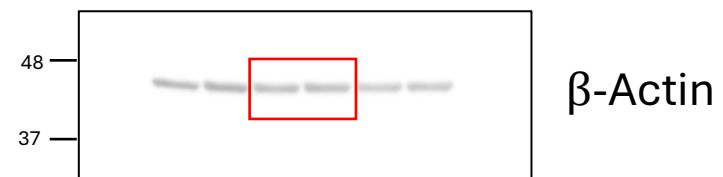

Supplement: fig3-data1 [file Figure 3B - source data 1.pdf › Figure 3 - source data 1/Figure 3B - source data 1/Figure 3B - source data 1.pdf]

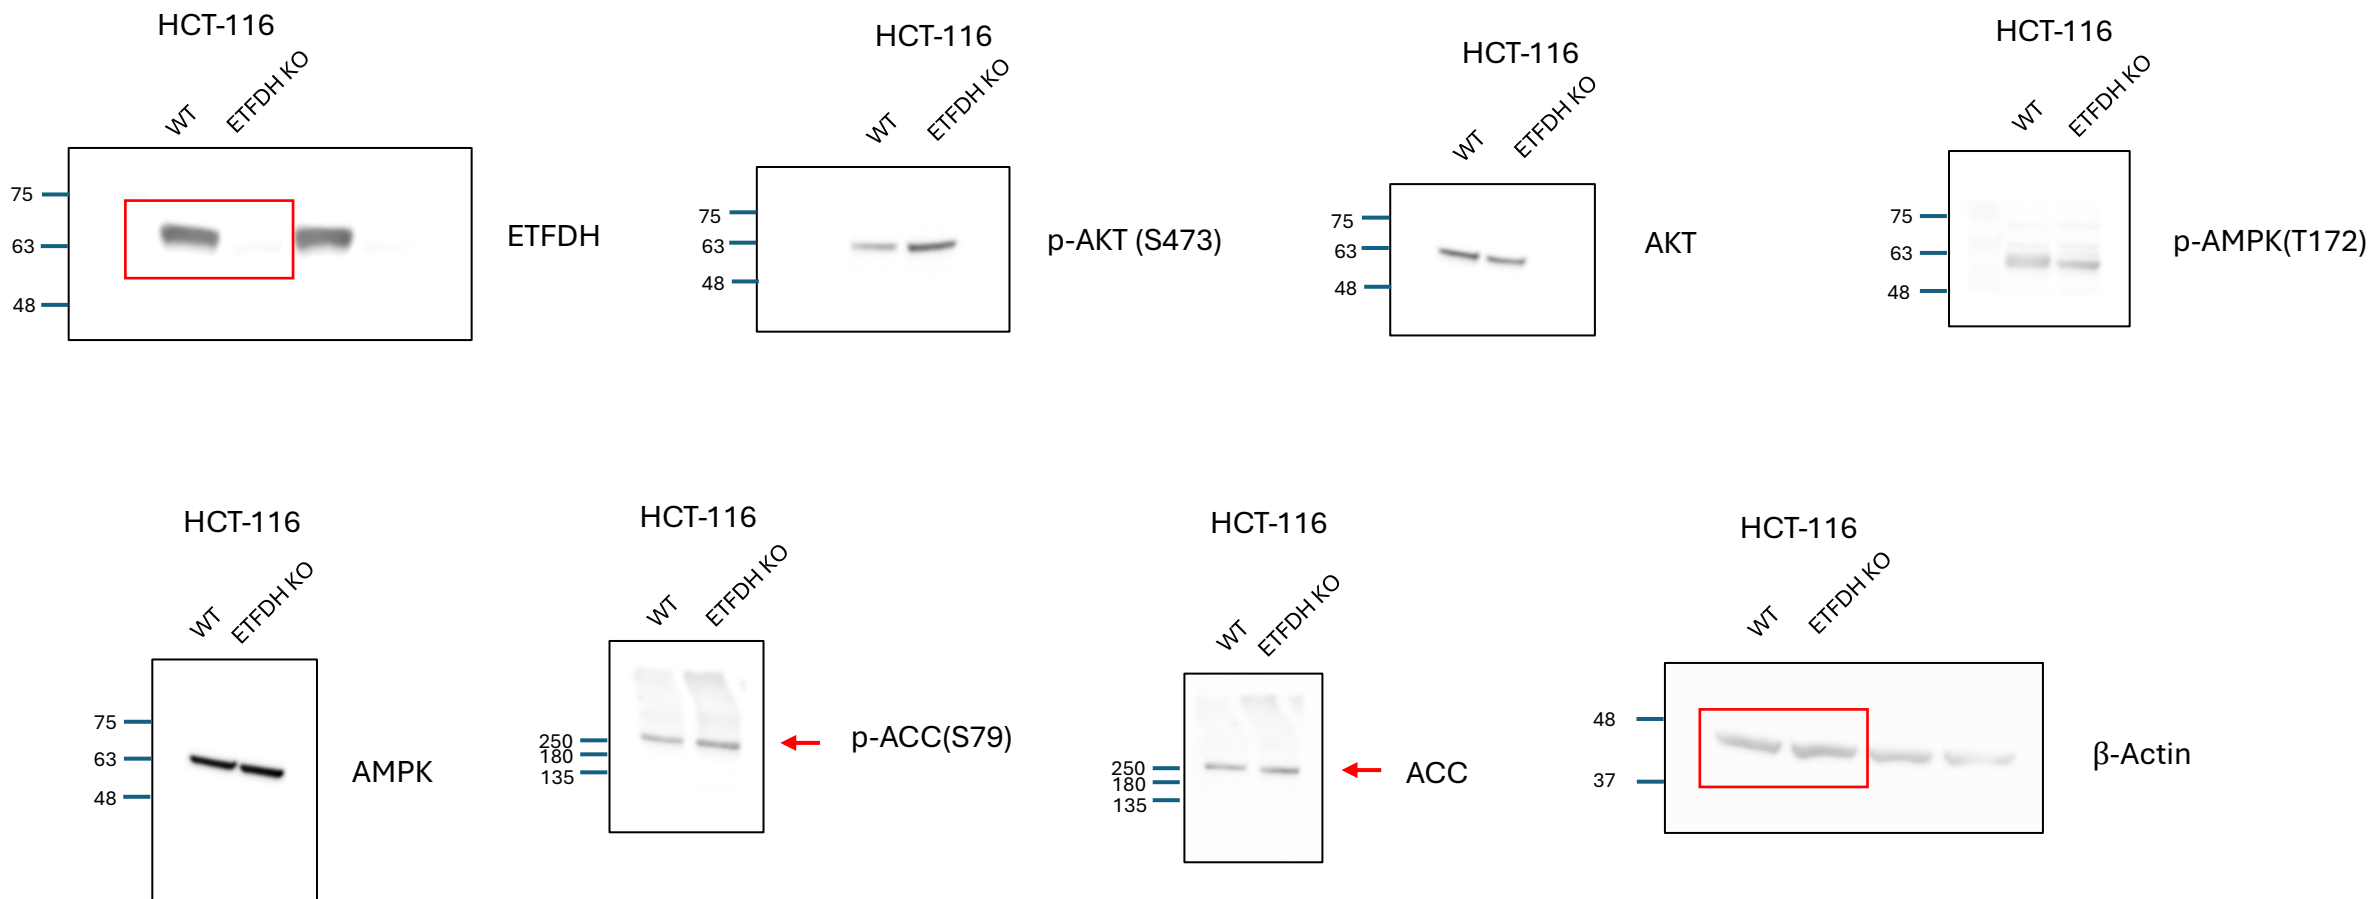

Supplement: fig3-figsupp1-data1 [file Figure 3-figure supplement 1A - source data 1.pdf › Figure 3-figure supplement 1 - source data 1/Figure 3-figure supplement 1A - source data 1/Figure 3-figure supplement 1A - source data 1.pdf]

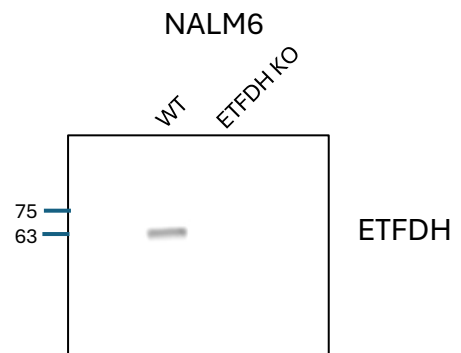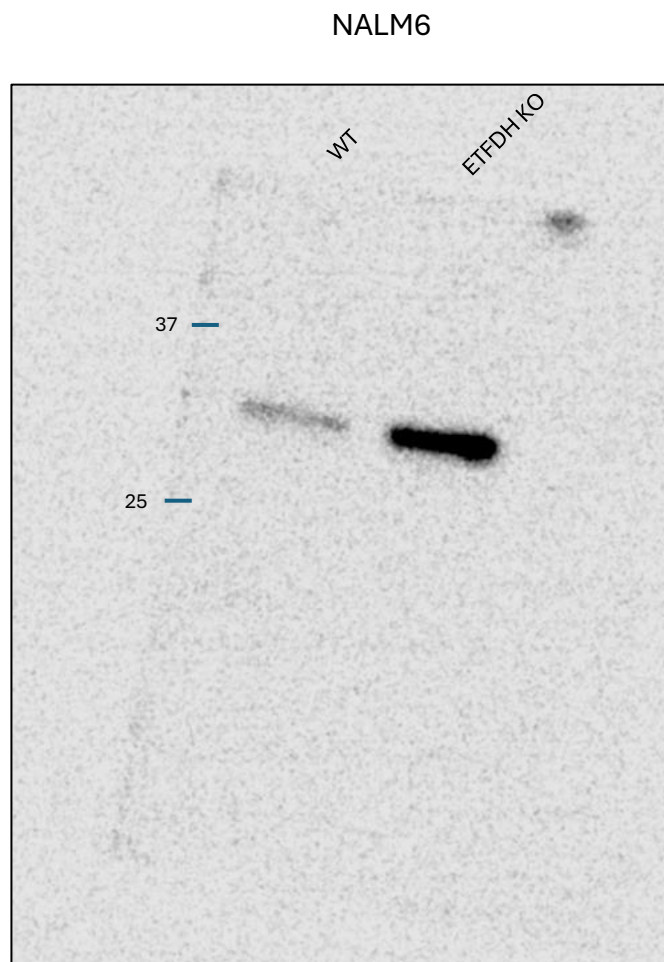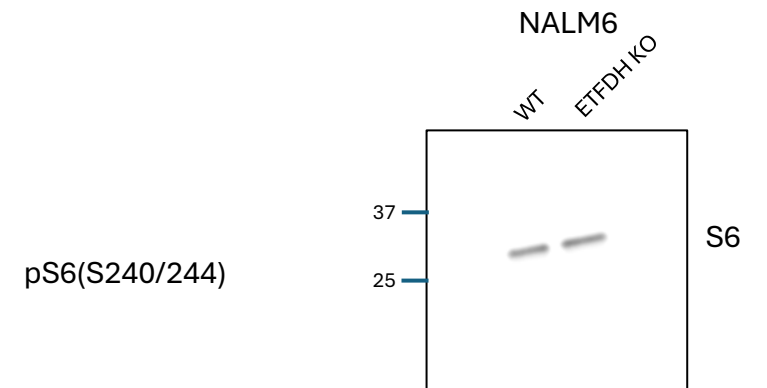

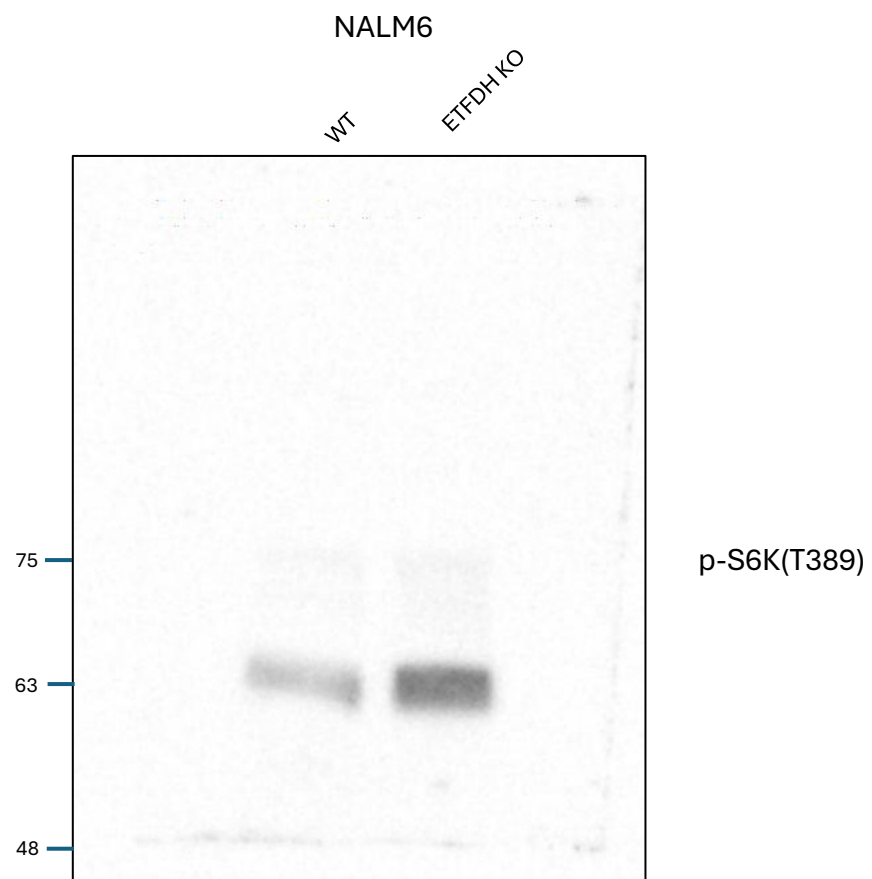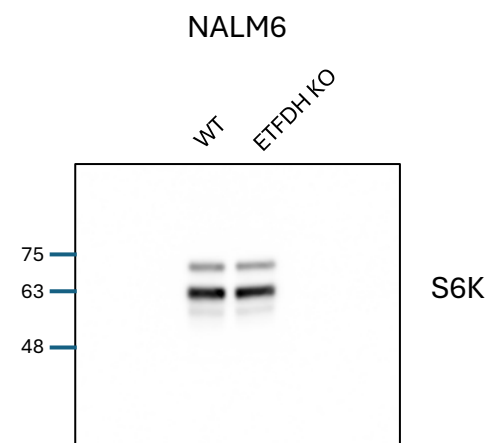

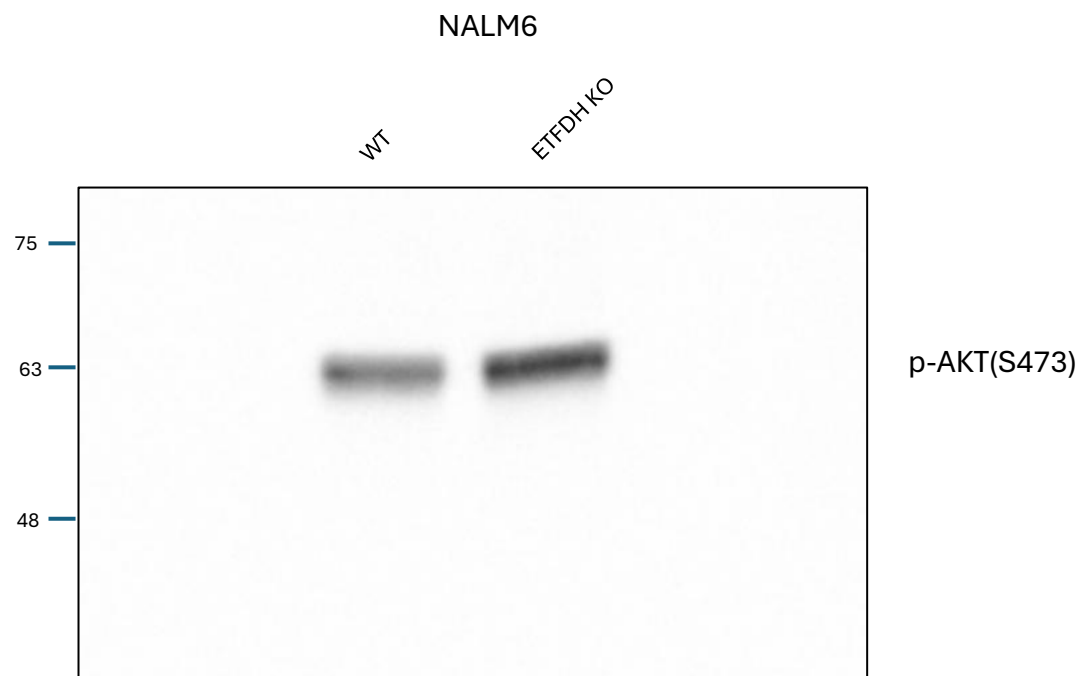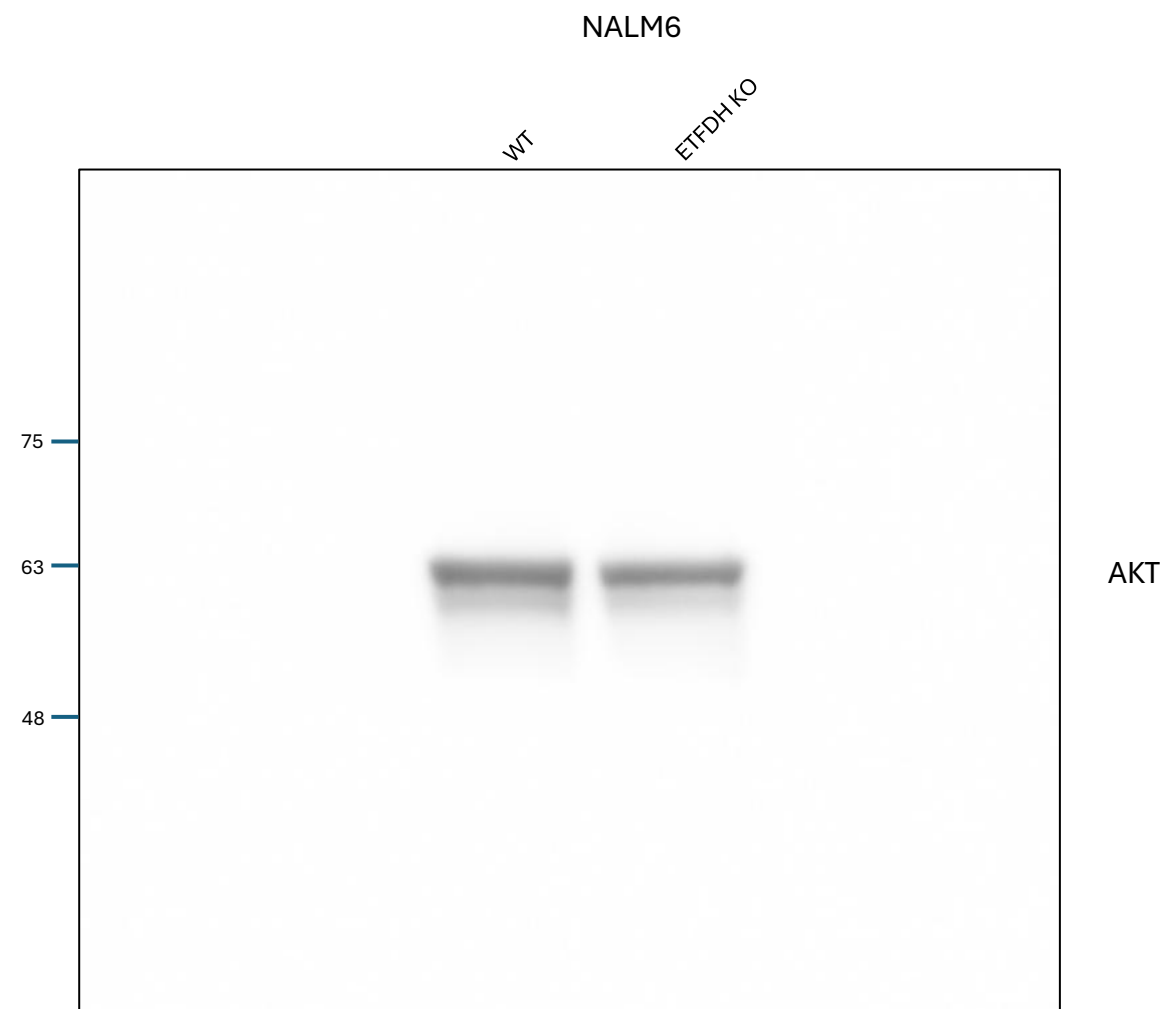

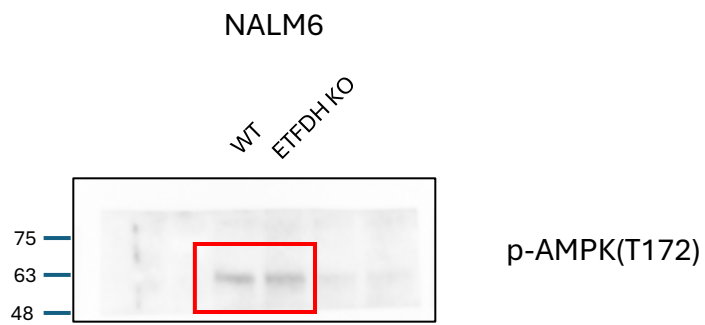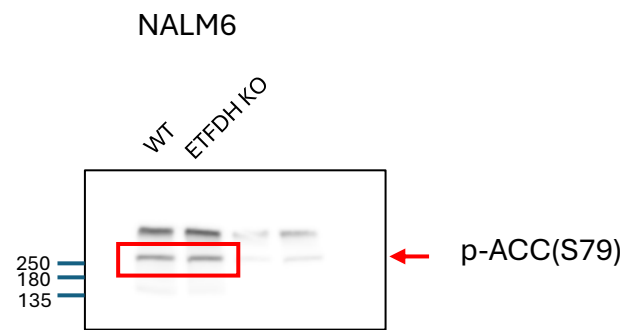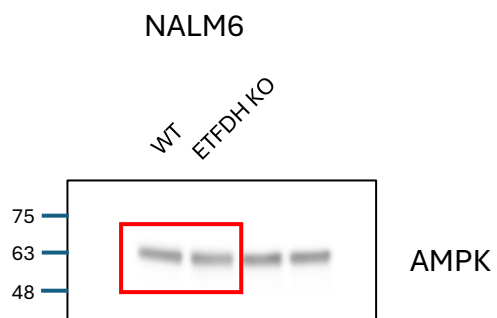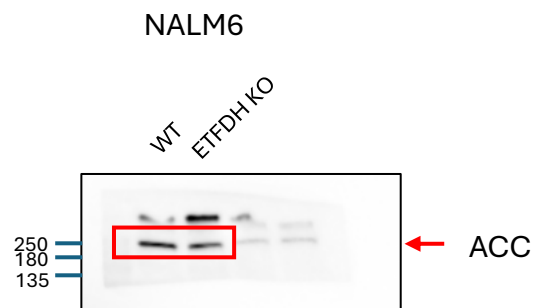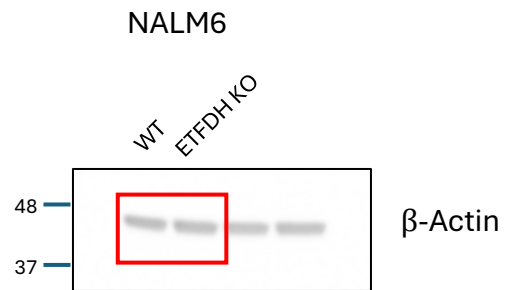

Supplement: fig3-figsupp1-data1 [file Figure 3-figure supplement 1B - source data 1.pdf › Figure 3-figure supplement 1 - source data 1/Figure 3-figure supplement 1B - source data 1/Figure 3-figure supplement 1B - source data 1.pdf]

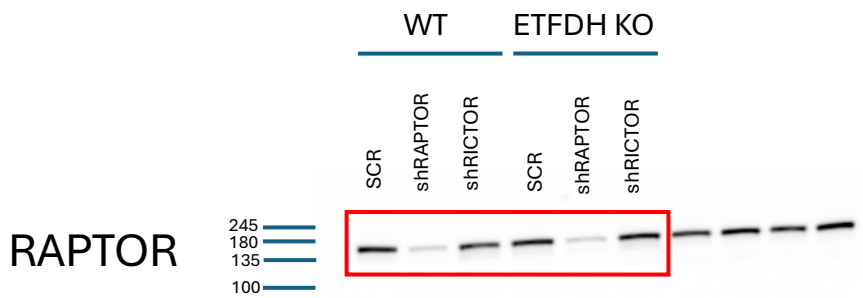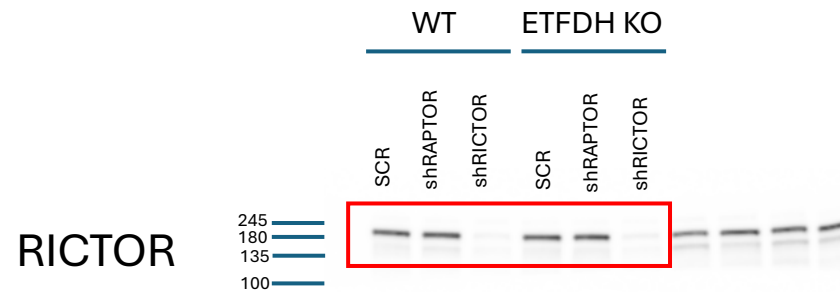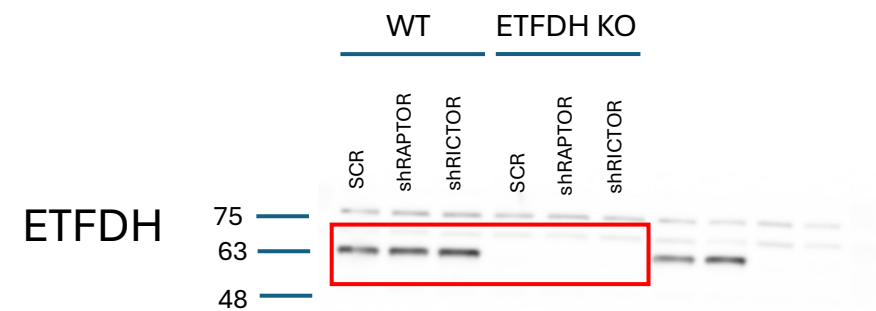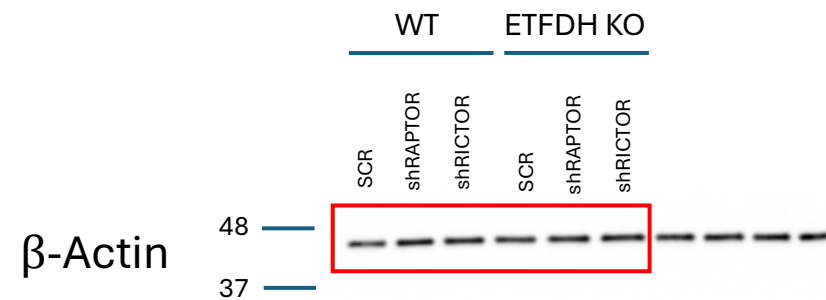

Supplement: fig3-figsupp1-data1 [file Figure 3-figure supplement 1D - source data.pdf › Figure 3-figure supplement 1 - source data 1/Figure 3-figure supplement 1D - source data 1/Figure 3-figure supplement 1D - source data.pdf]

## ETFDH

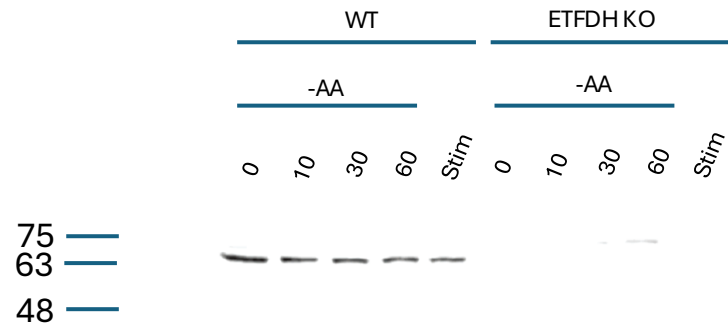

## p-eIF2 $\alpha$ (S51)

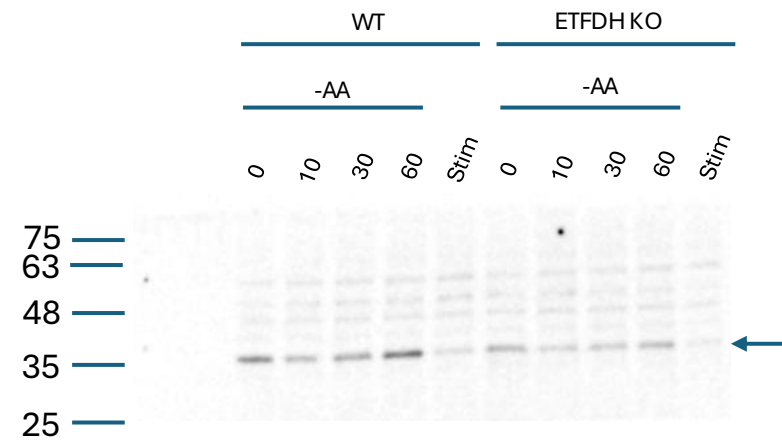

## eIF2 $\alpha$

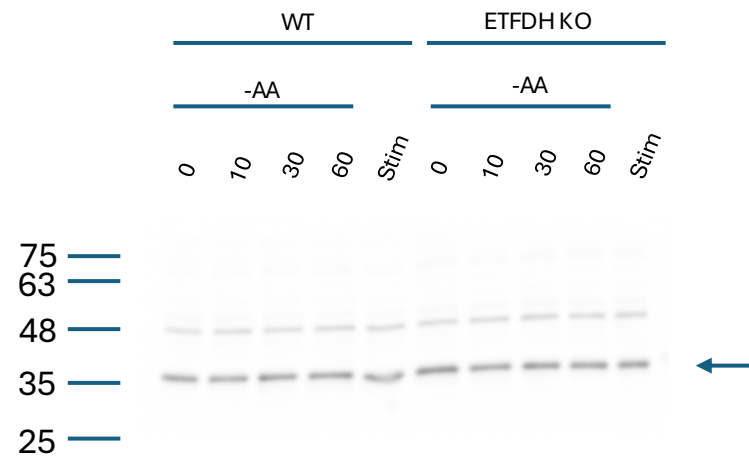

## ATF4

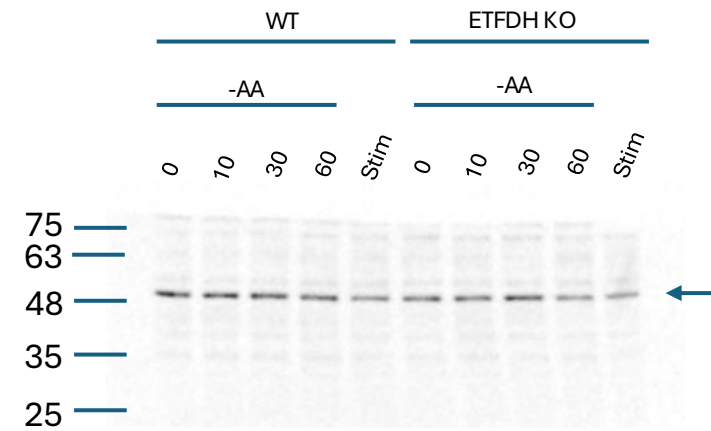

# $\beta$ -Actin

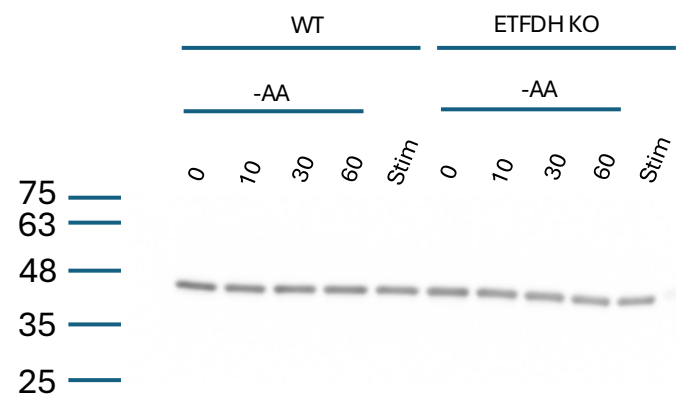

Supplement: fig3-figsupp1-data1 [file Figure 3-figure supplement 1H - source data 1.pdf › Figure 3-figure supplement 1 - source data 1/Figure 3-figure supplement 1H - source data 1/Figure 3-figure supplement 1H - source data 1.pdf]

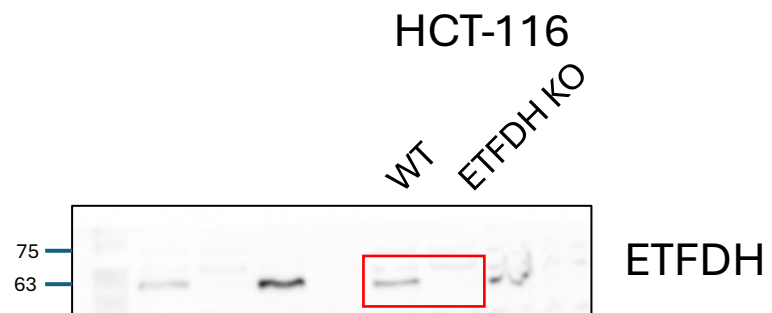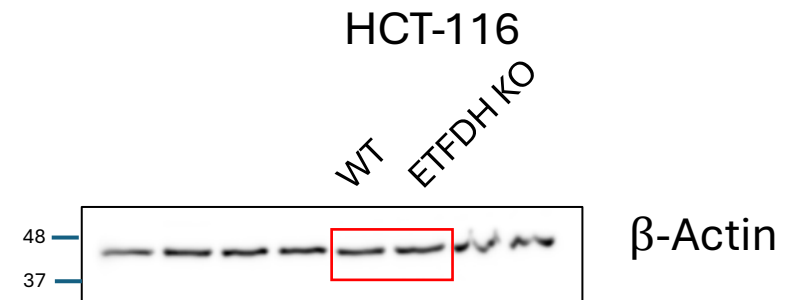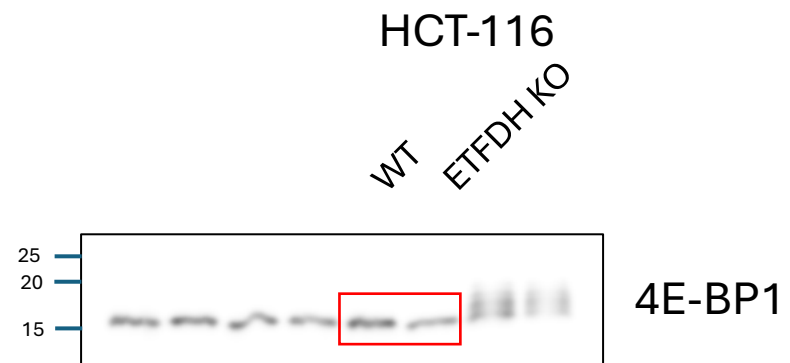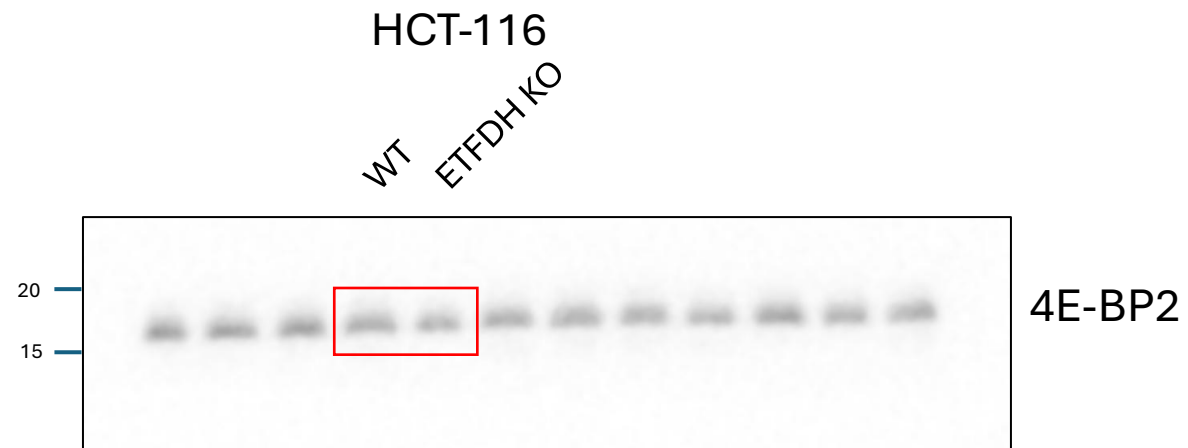

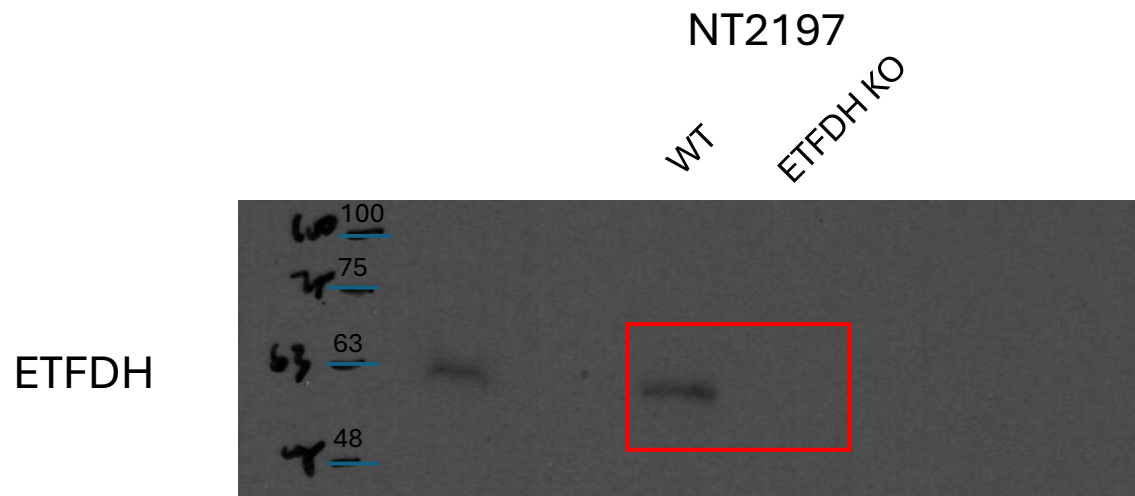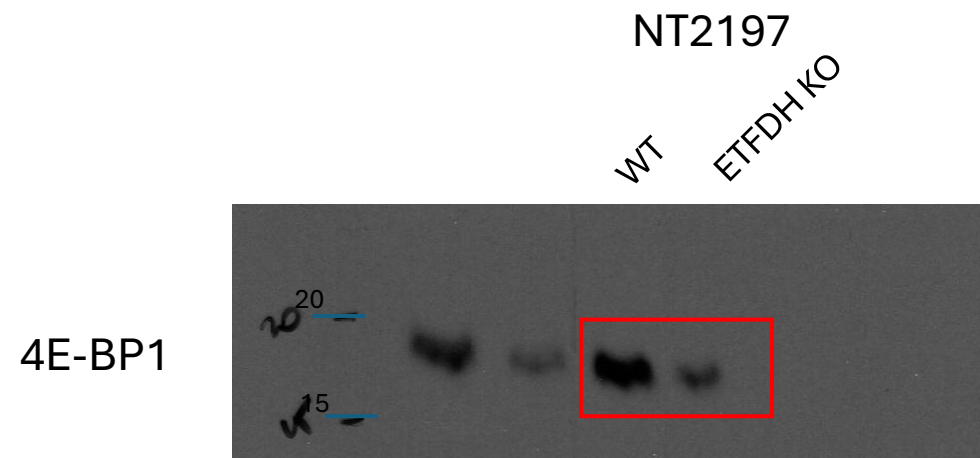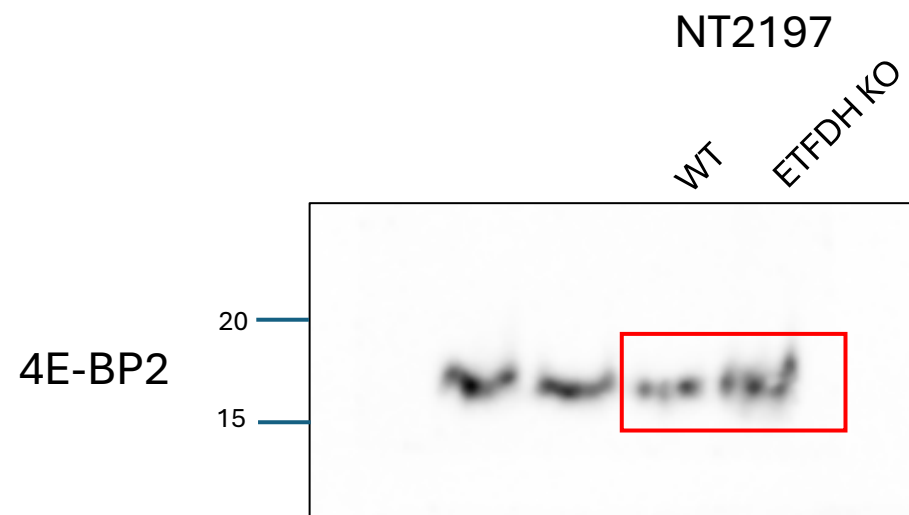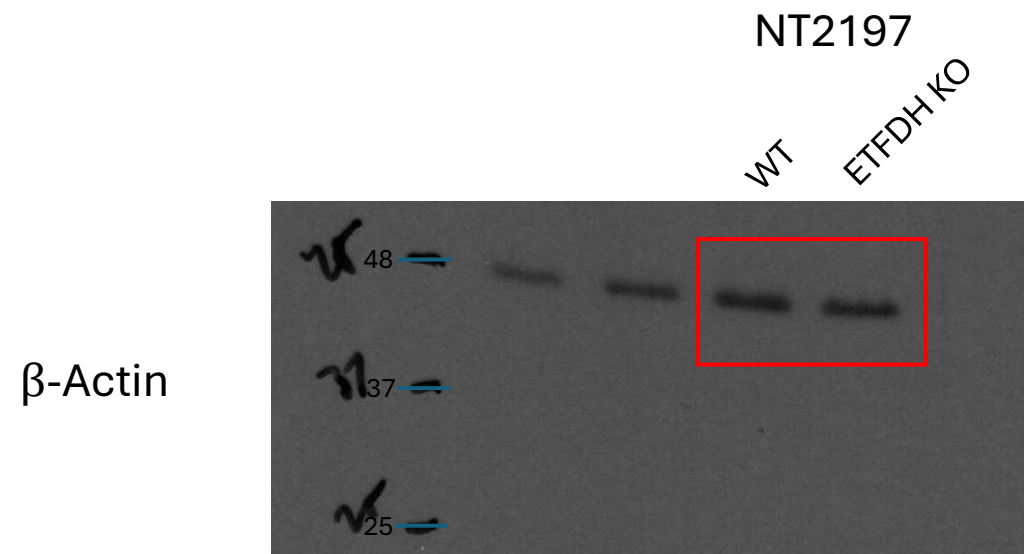

Supplement: fig4-data1 [file Figure 4B - source data 1.pdf › Figure 4 - source data 1/Figure 4B - source data 1/Figure 4B - source data 1.pdf]

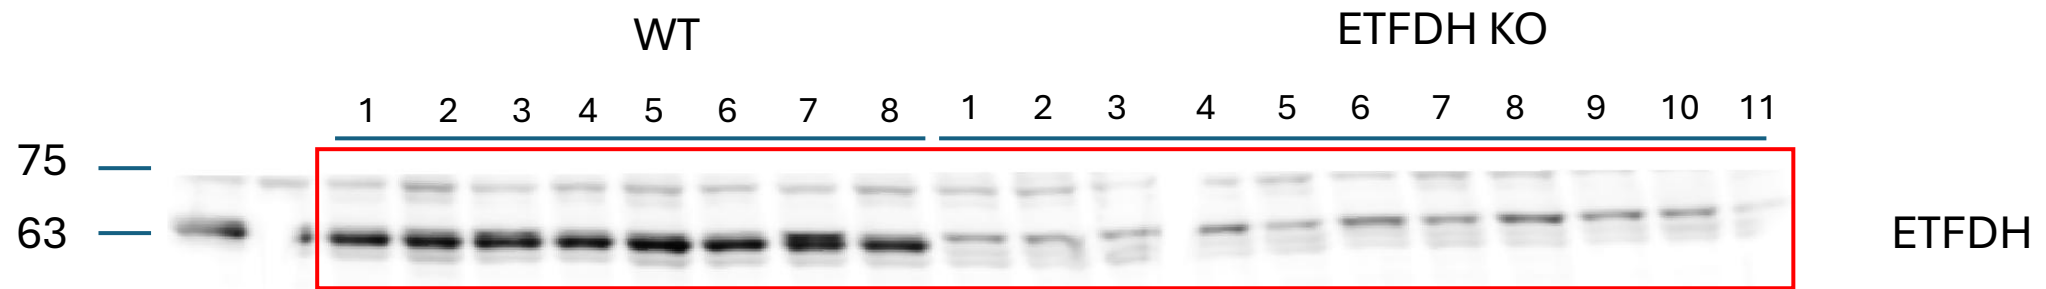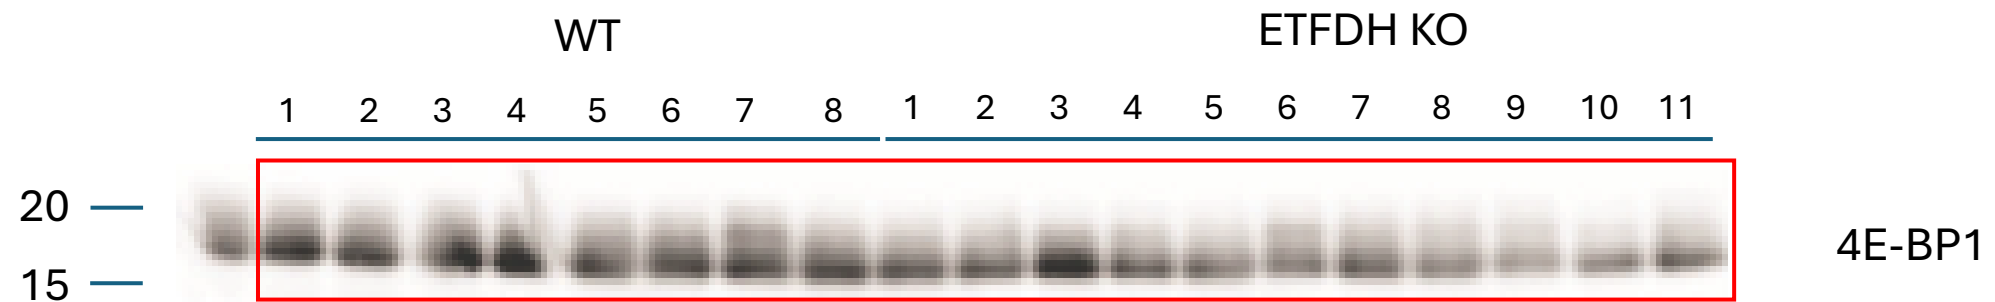

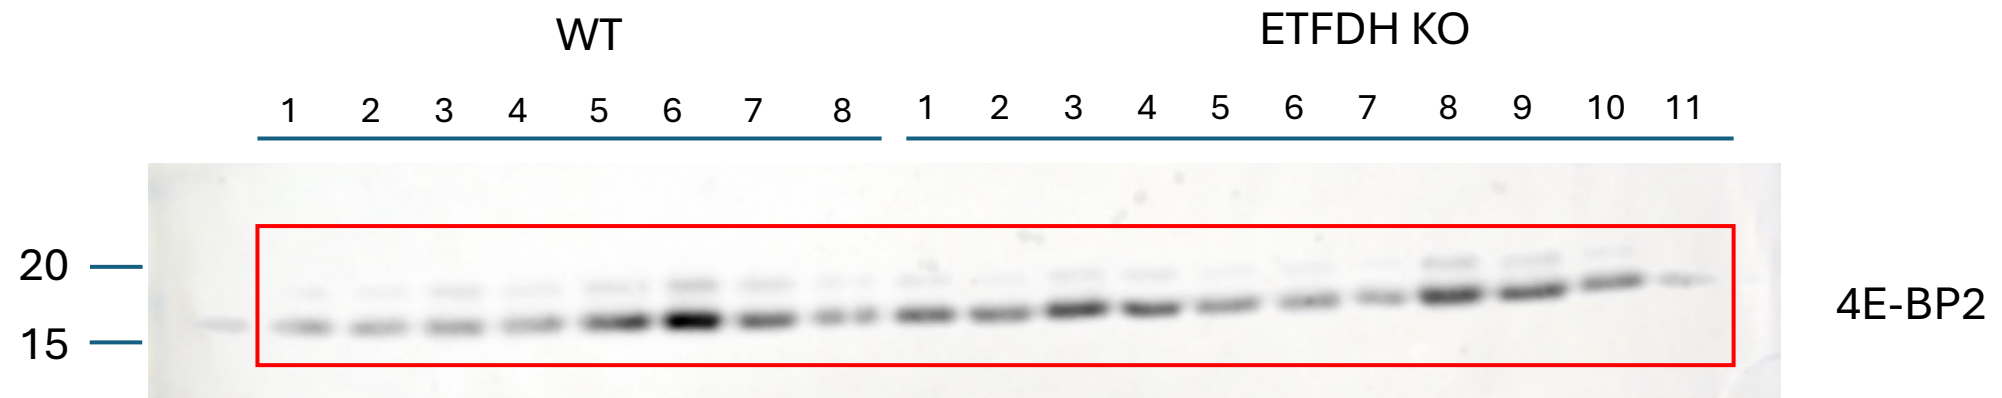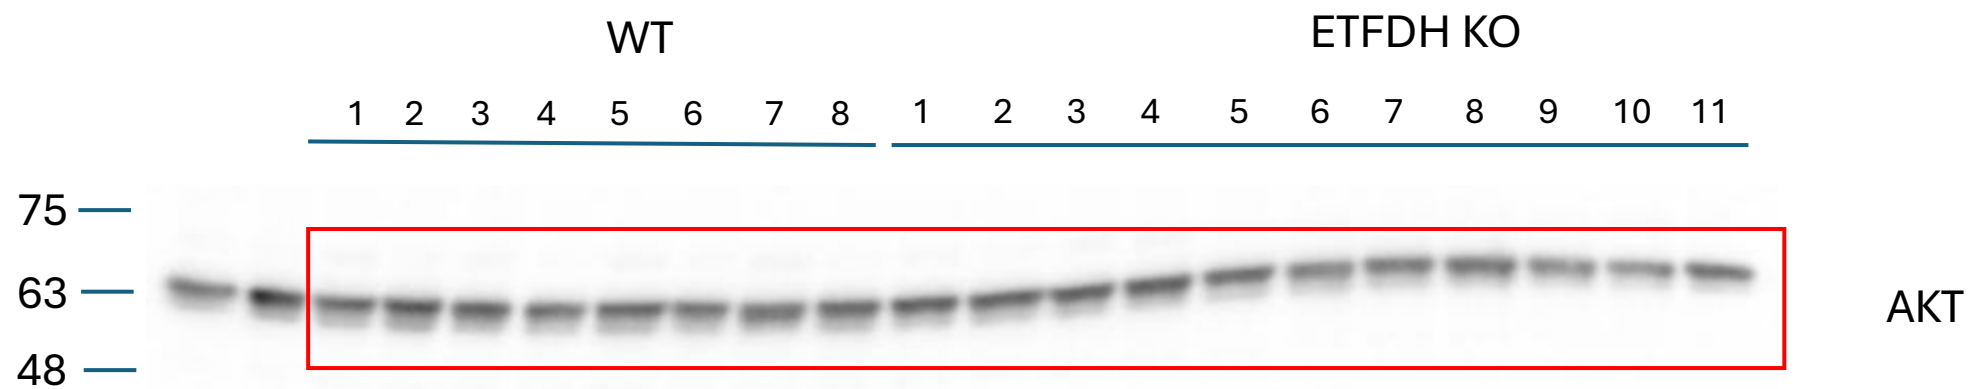

Supplement: fig4-data1 [file Figure 4C - source data 1.pdf › Figure 4 - source data 1/Figure 4C - source data 1/Figure 4C - source data 1.pdf]

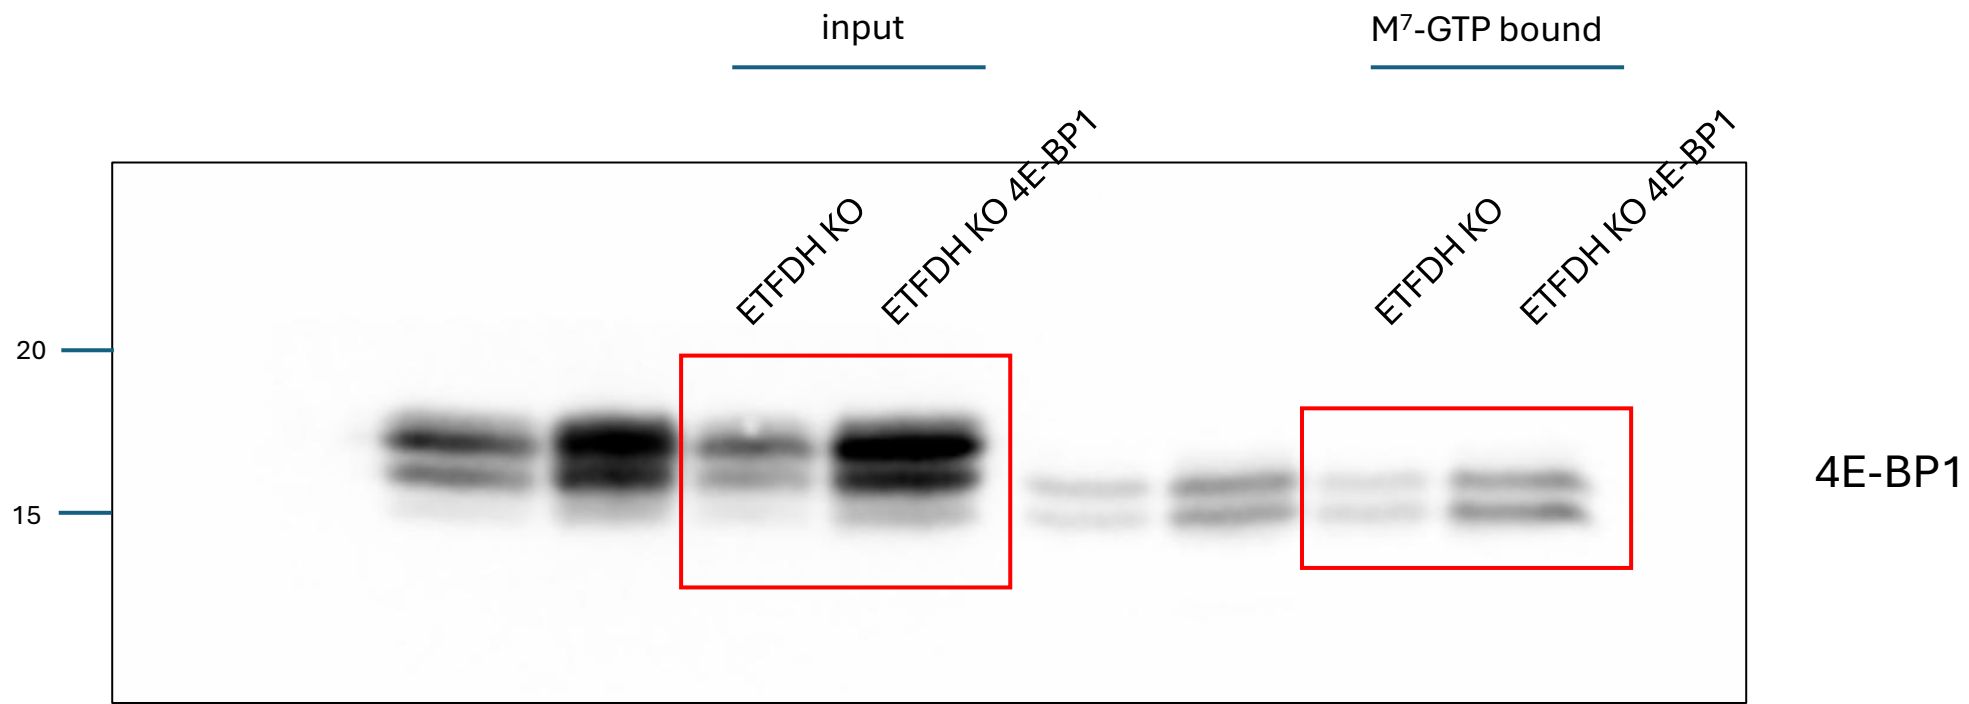

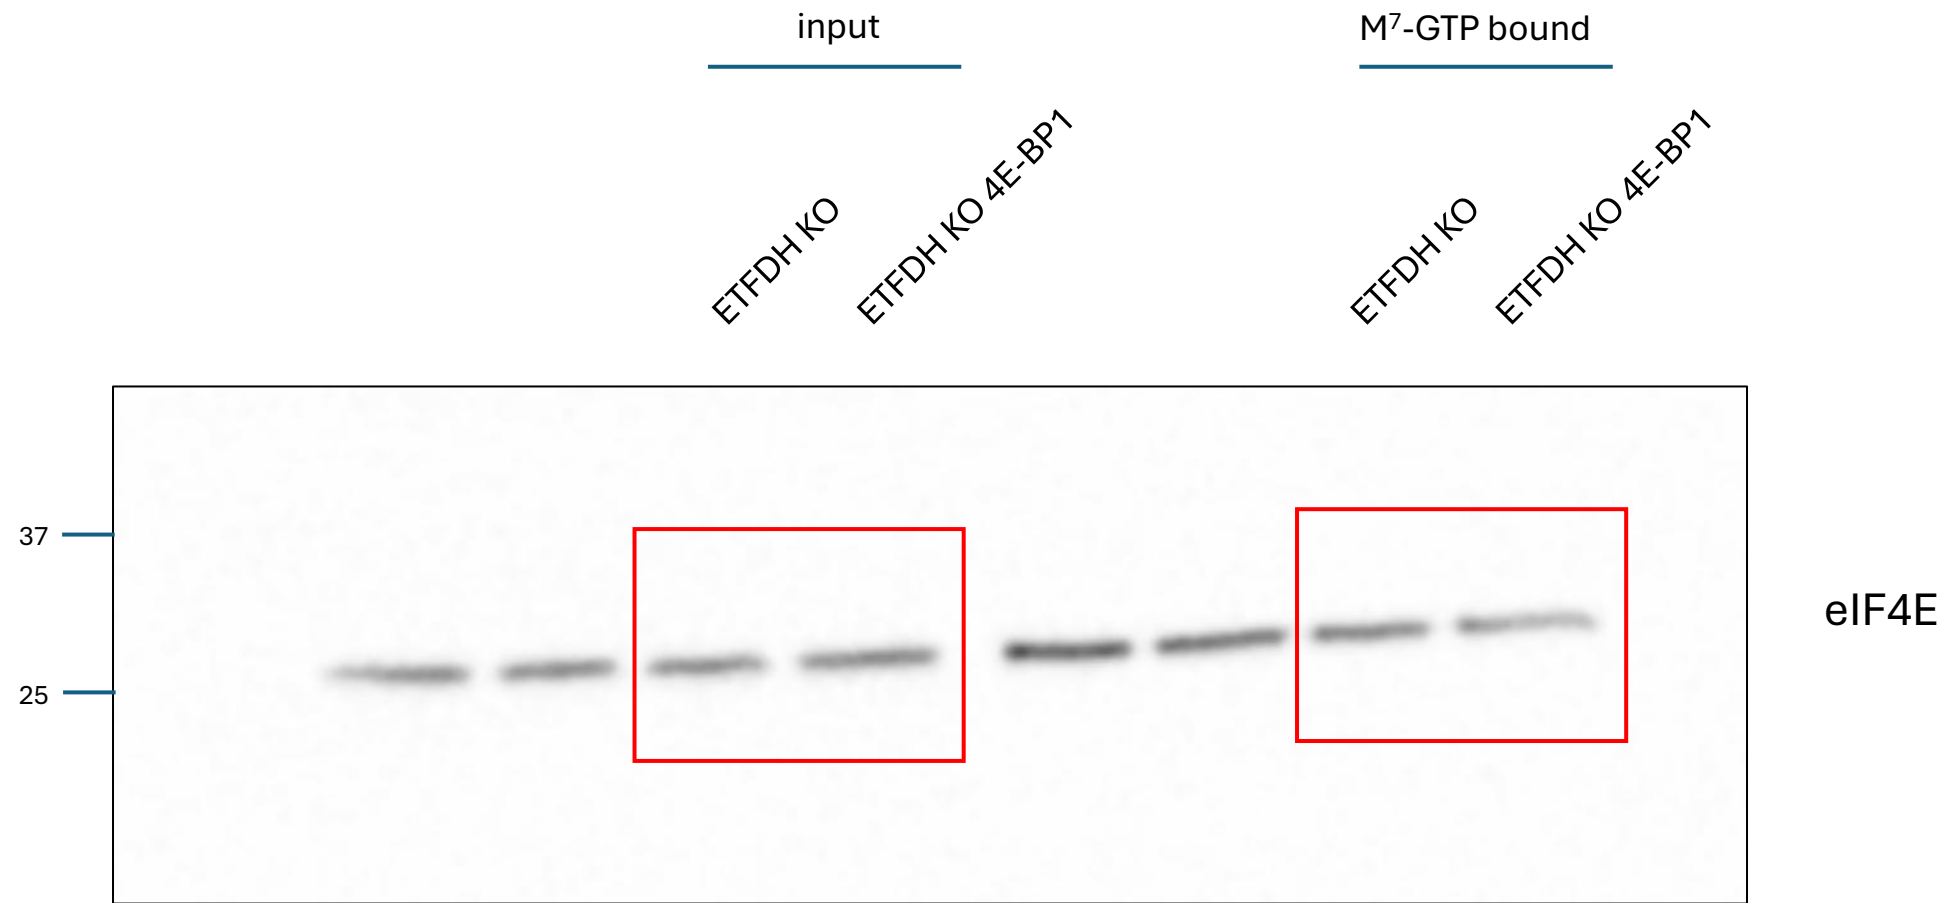

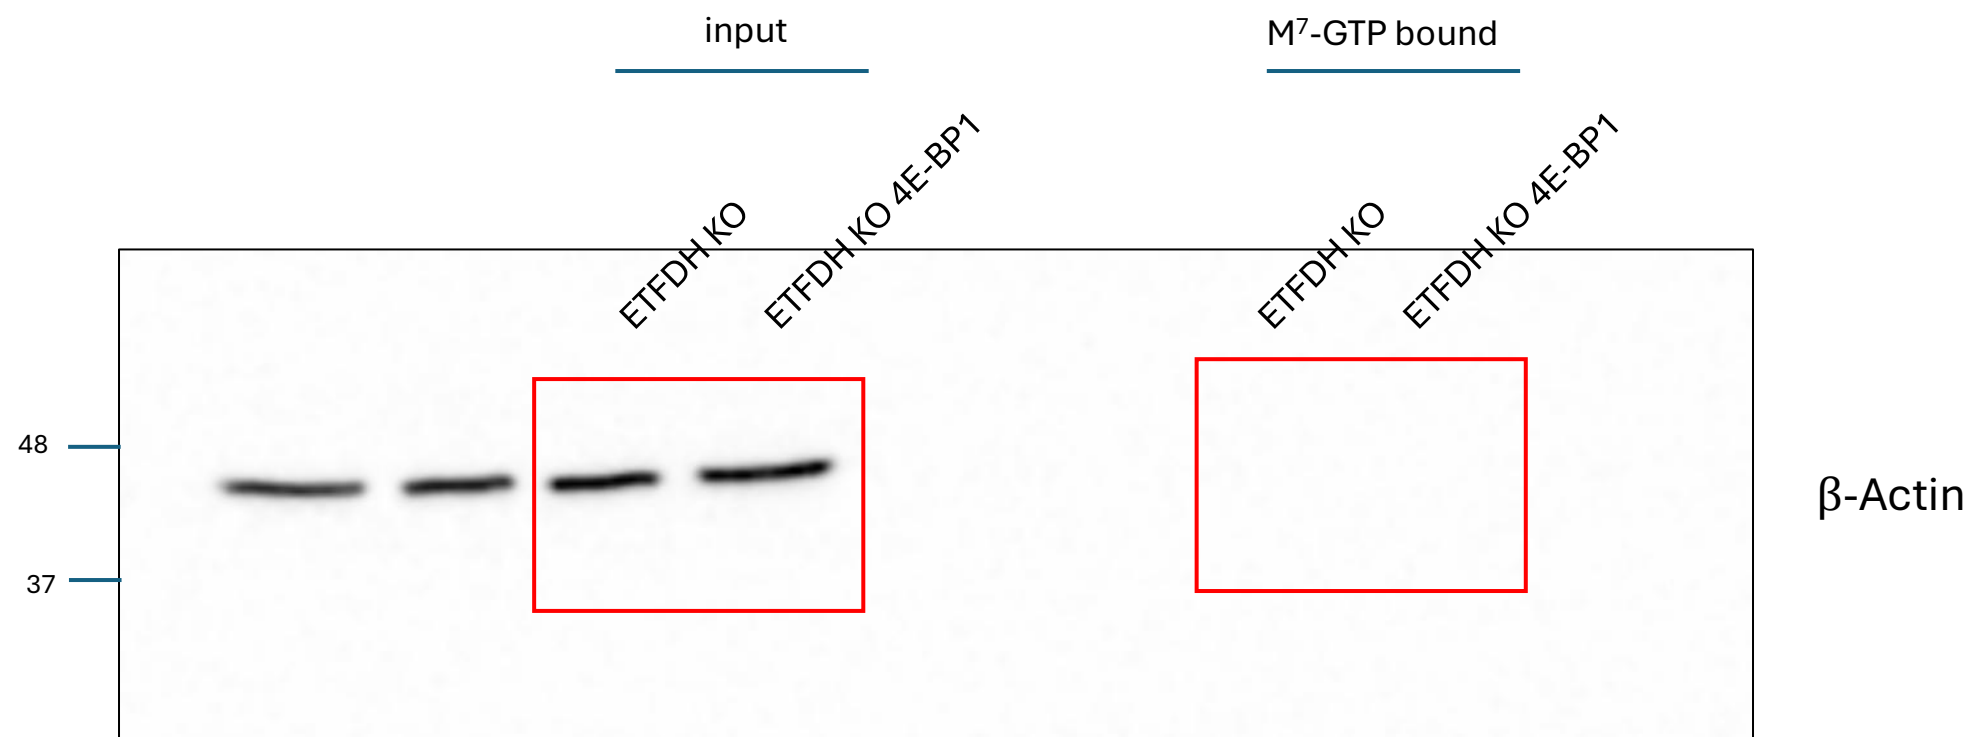

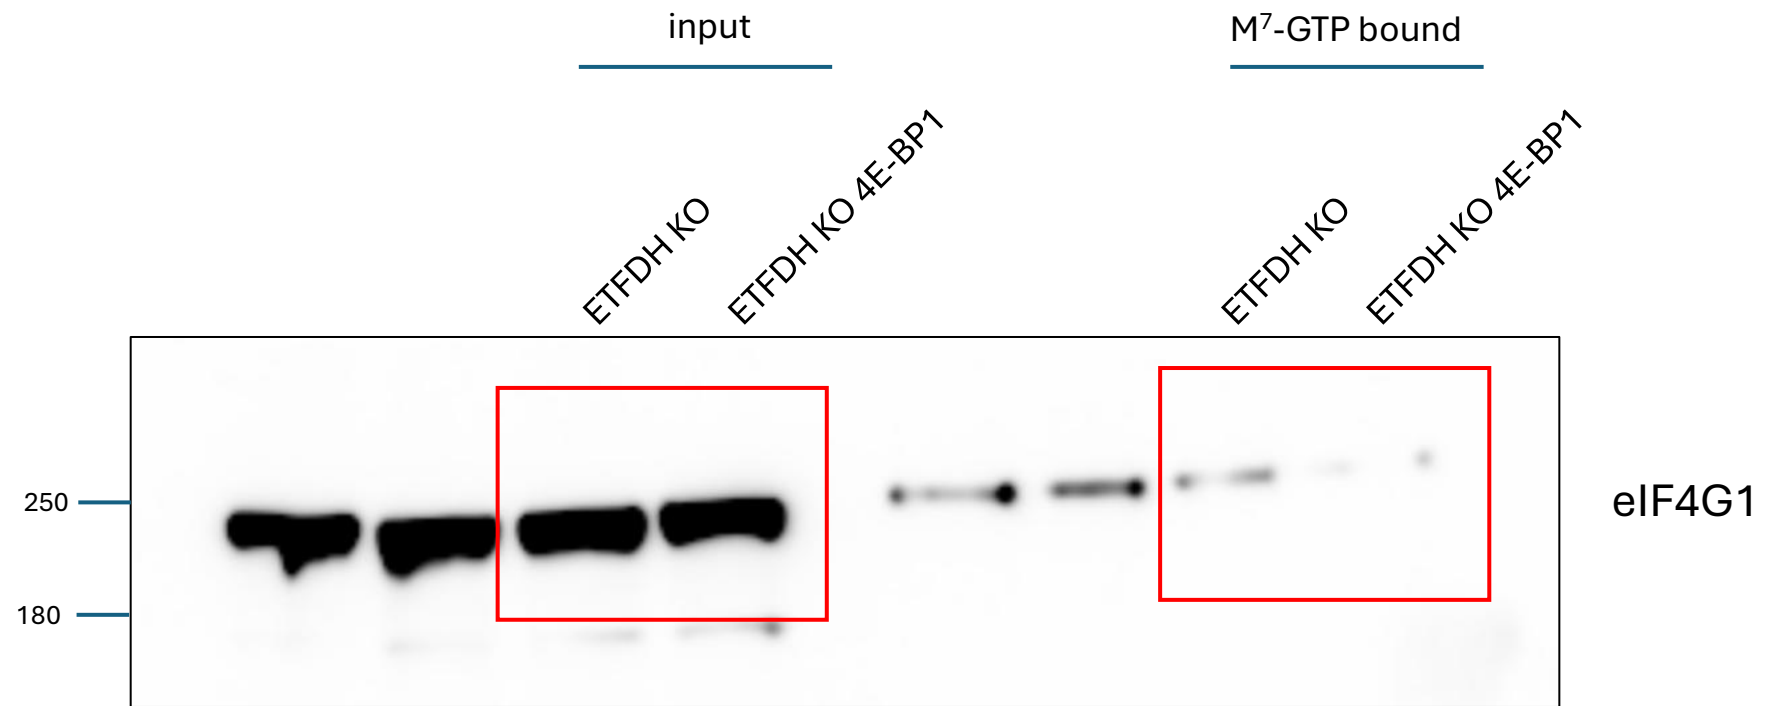

Supplement: fig4-data1 [file Figure 4F - source data 1.pdf › Figure 4 - source data 1/Figure 4F - source data 1/Figure 4F - source data 1.pdf]

HCT-116

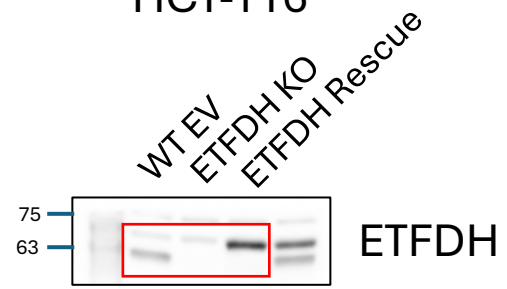

HCT-116

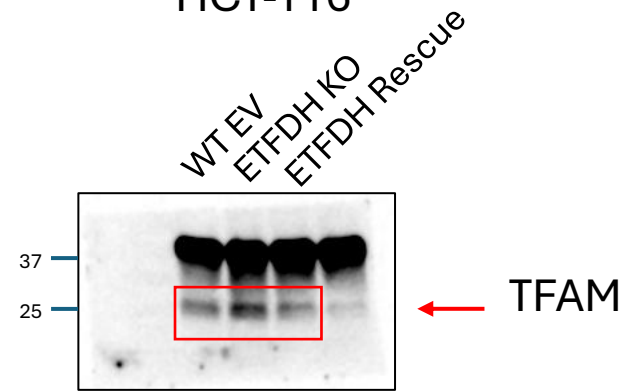

HCT-116

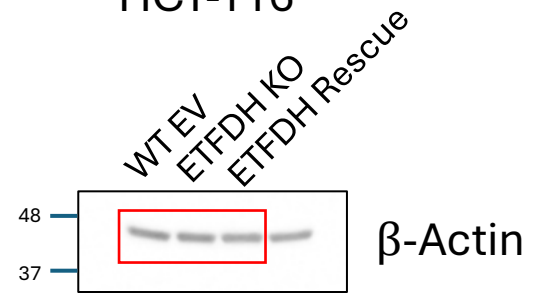

Supplement: fig4-data1 [file Figure 4K - source data 1.pdf › Figure 4 - source data 1/Figure 4K - source data 1/Figure 4K - source data 1.pdf]

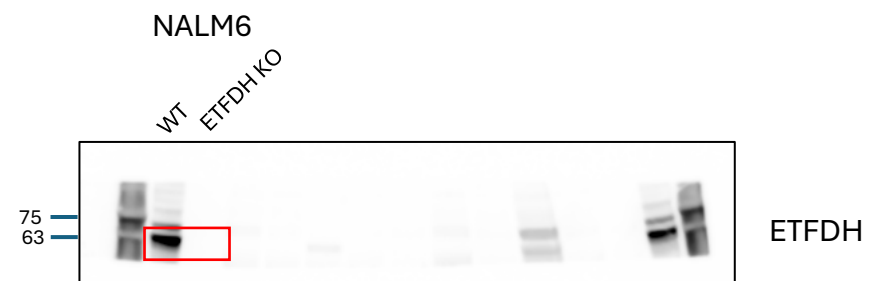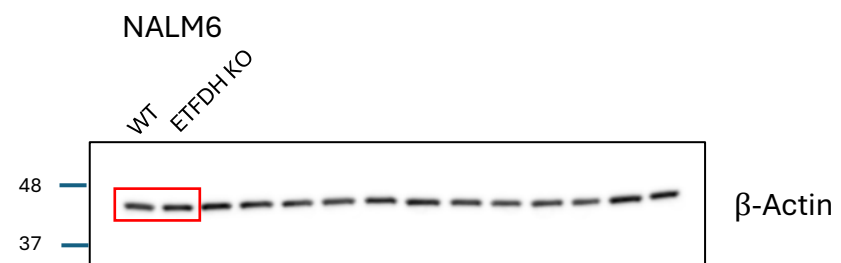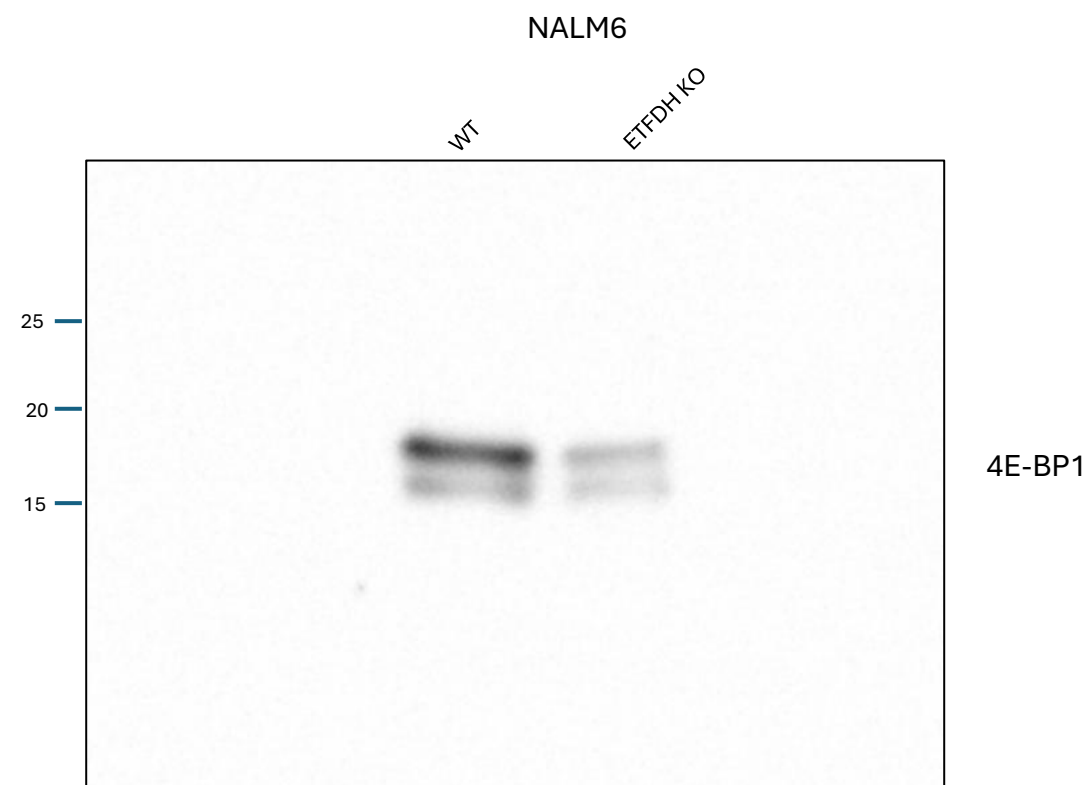

Supplement: fig4-figsupp1-data1 [file Figure 4-figure supplement 1A - source data 1.pdf › Figure 4-figure supplement 1 - source data 1/Figure 4-figure supplement 1A - source data 1/Figure 4-figure supplement 1A - source data 1.pdf]

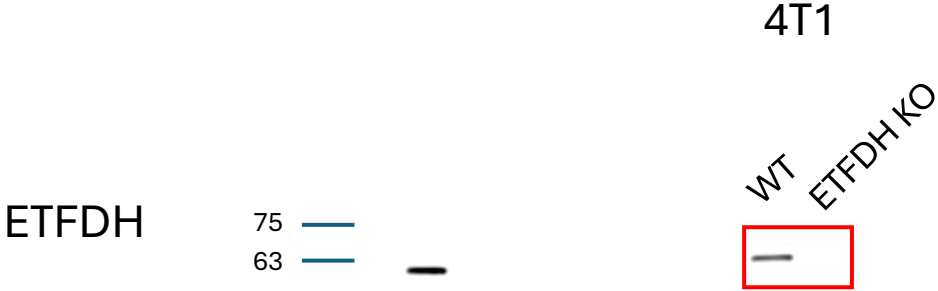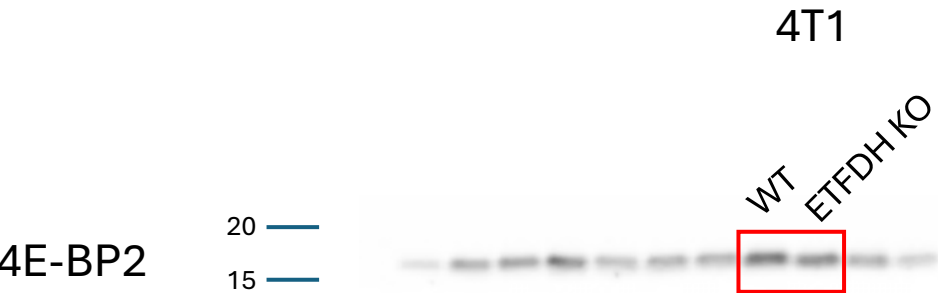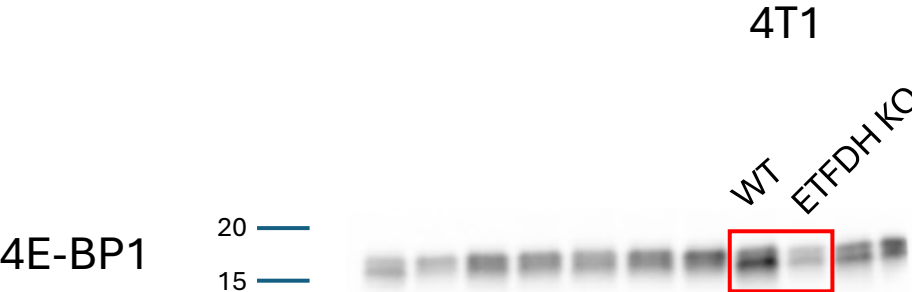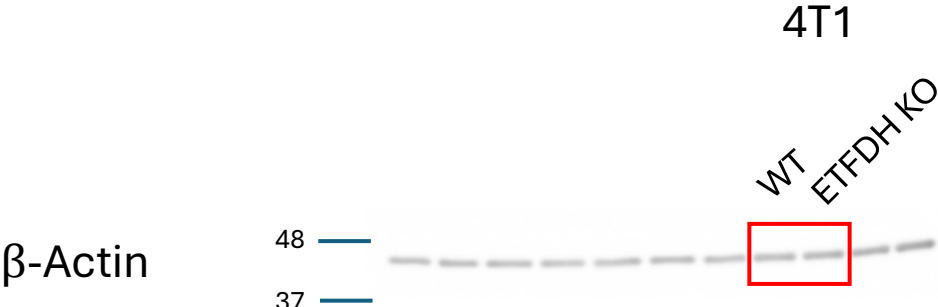

Supplement: fig4-figsupp1-data1 [file Figure 4-figure supplement 1B - source data 1.pdf › Figure 4-figure supplement 1 - source data 1/Figure 4-figure supplement 1B - source data 1/Figure 4-figure supplement 1B - source data 1.pdf]

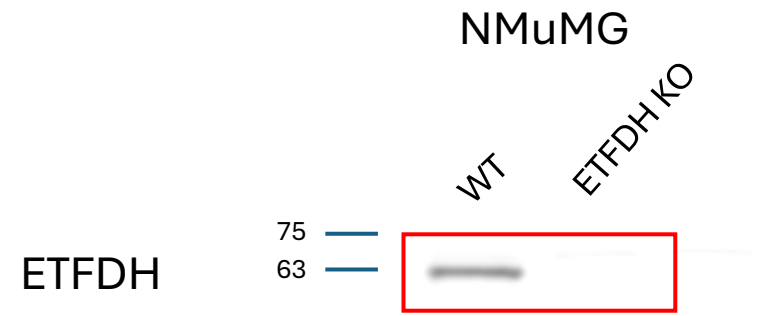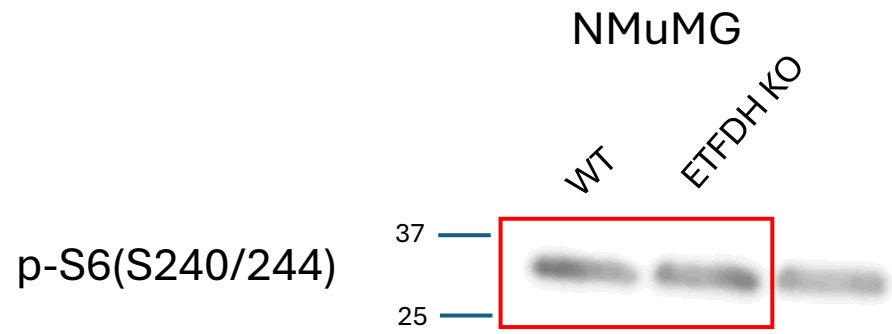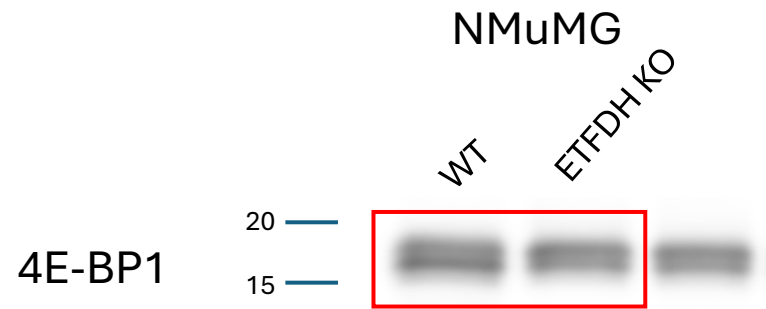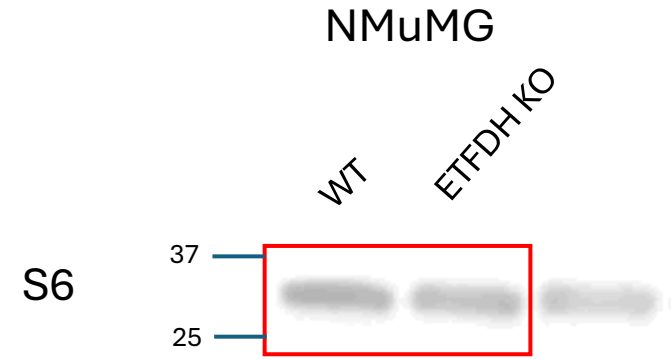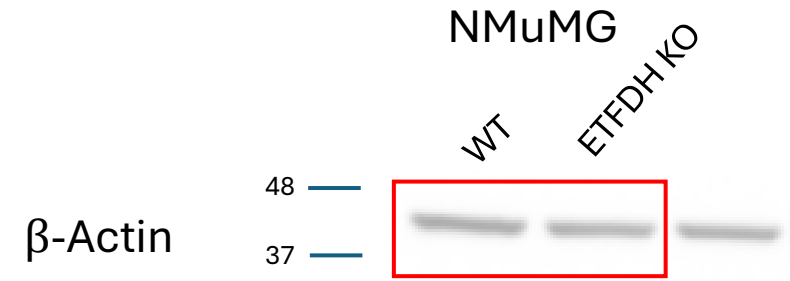

Supplement: fig4-figsupp1-data1 [file Figure 4-figure supplement 1C - source data 1.pdf › Figure 4-figure supplement 1 - source data 1/Figure 4-figure supplement 1C - source data 1/Figure 4-figure supplement 1C - source data 1.pdf]

## HCT-116

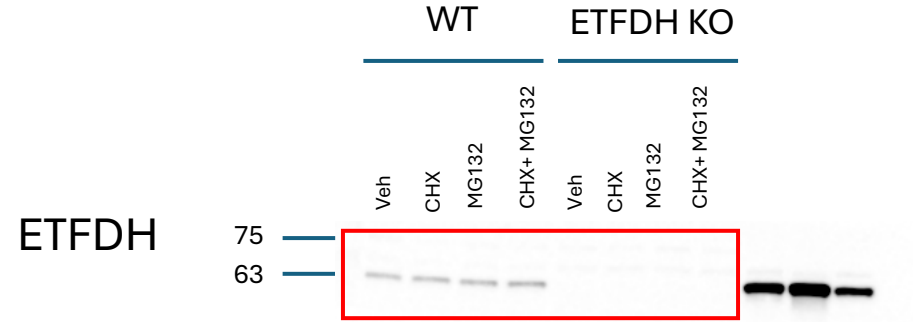

## HCT-116

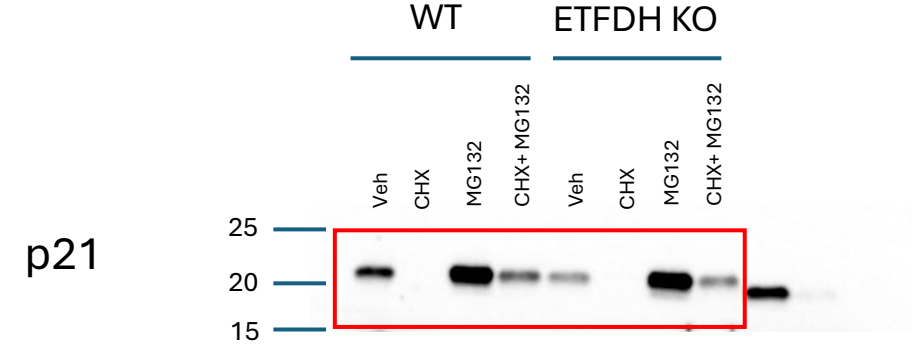

## HCT-116

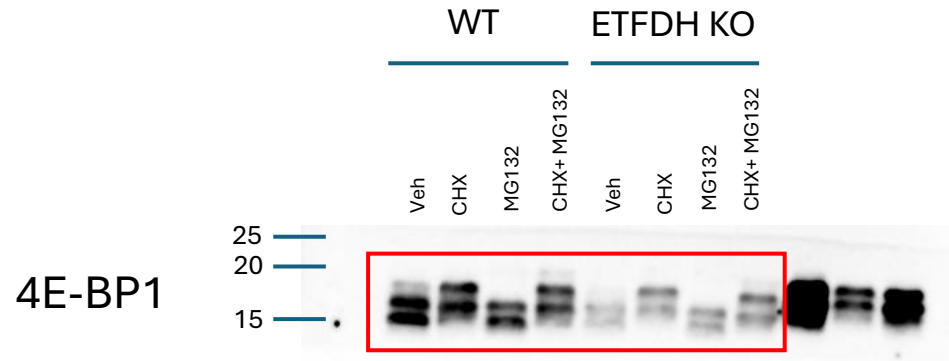

## HCT-116

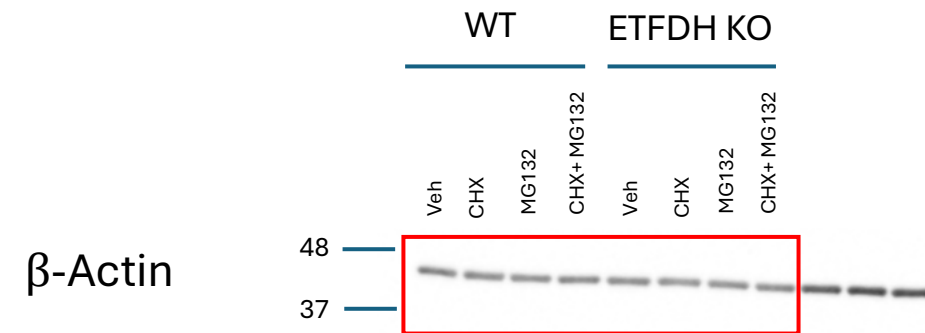

Supplement: fig4-figsupp1-data1 [file Figure 4-figure supplement 1G - source data 1.pdf › Figure 4-figure supplement 1 - source data 1/Figure 4-figure supplement 1G - source data 1/Figure 4-figure supplement 1G - source data 1.pdf]

HCT-116

WT      ETFDH KO

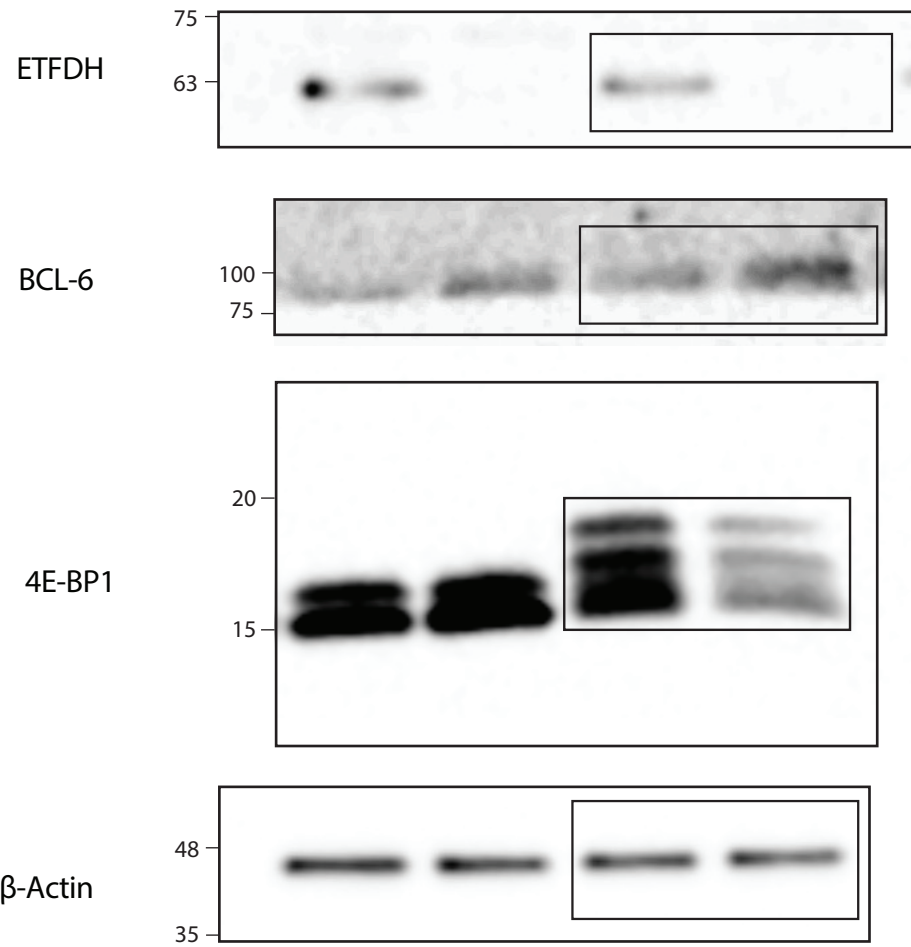

NT2197

WT      ETFDH KO

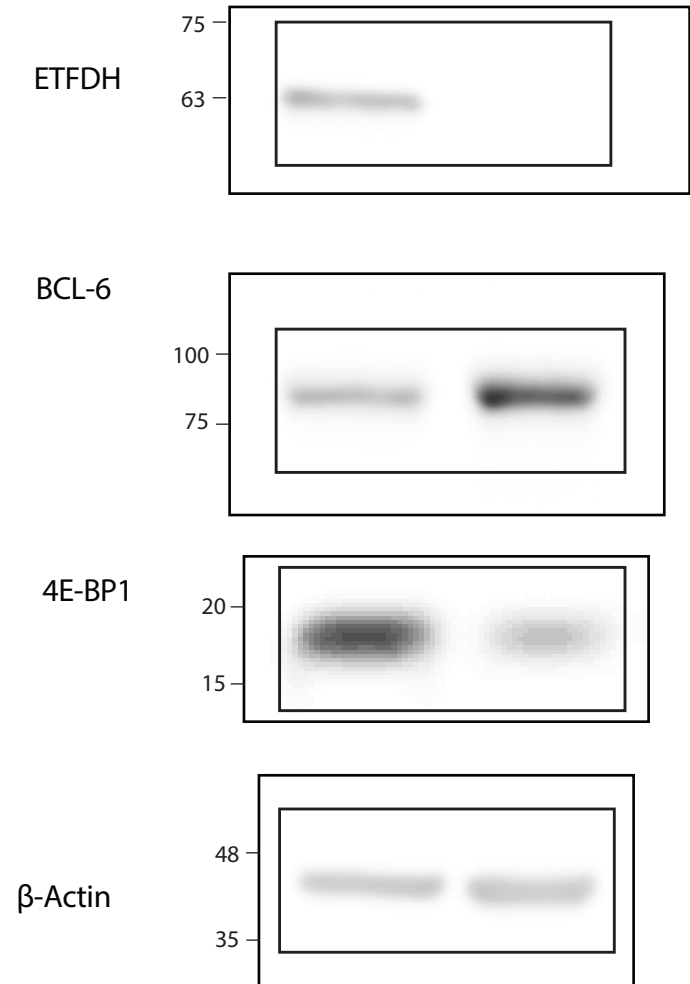

Supplement: fig5-data1 [file Figure 5A - source data 1.pdf › Figure 5 - source data 1/Figure 5A - source data 1/Figure 5A - source data 1.pdf]

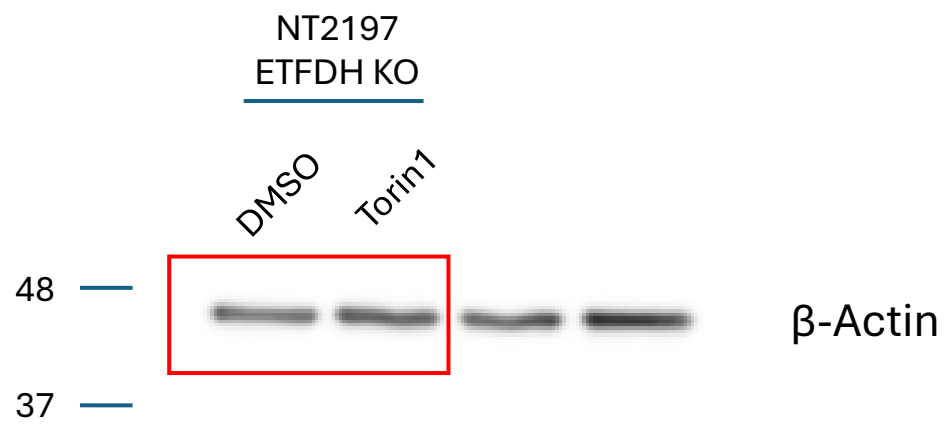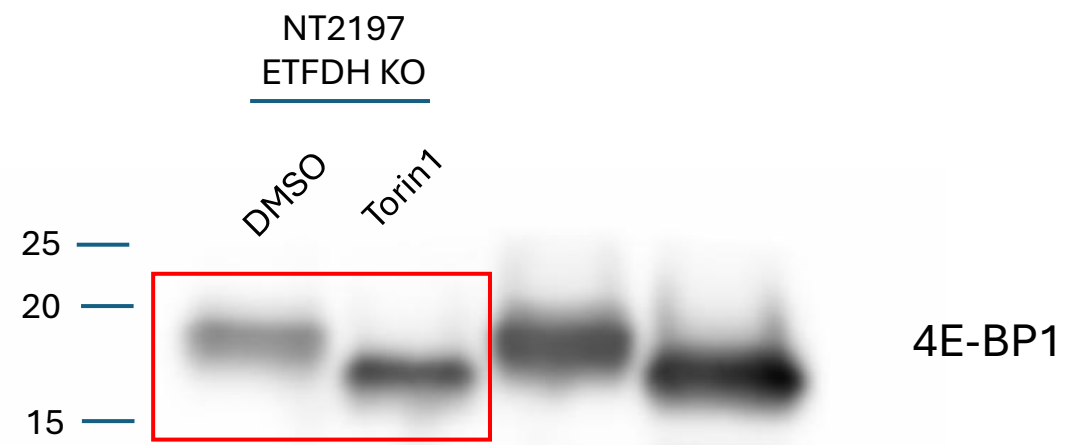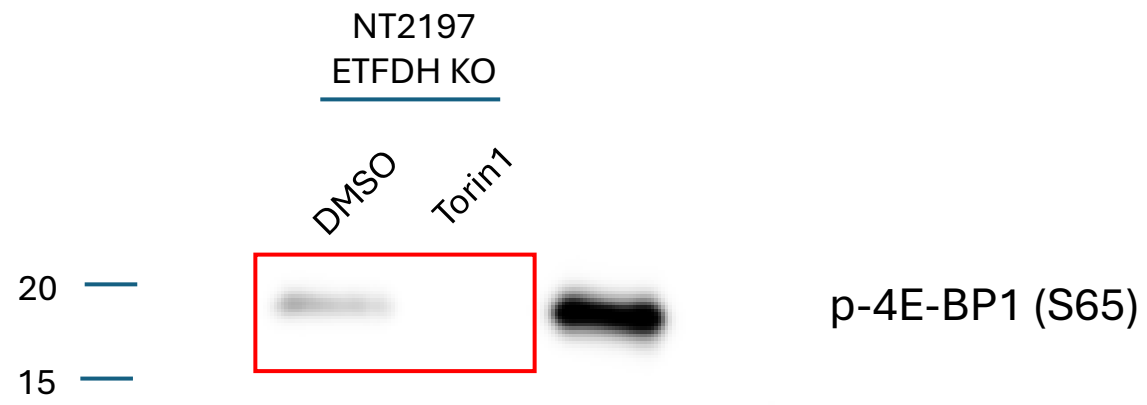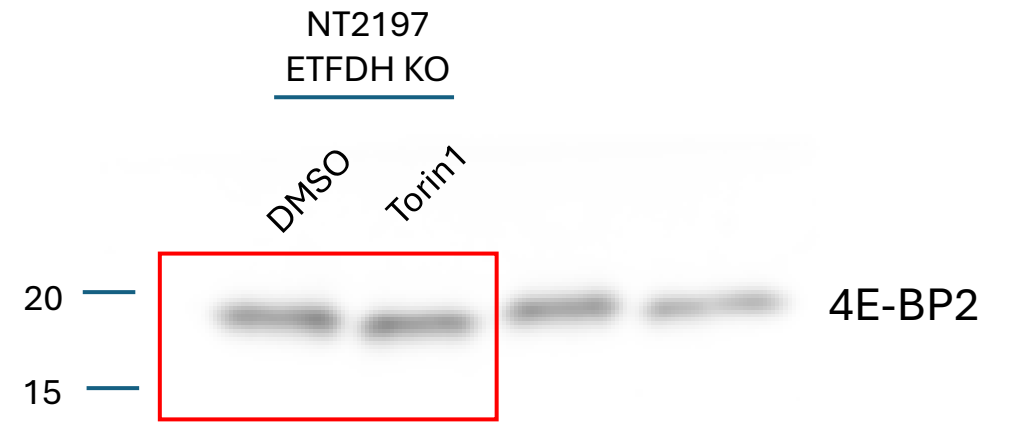

NT2197  
ETFDH KO

DMSO

Torin1

37 —  
25 —

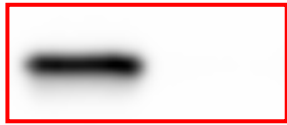

p-S6 (S240/244)

NT2197  
ETFDH KO

DMSO

Torin1

37 —  
25 —

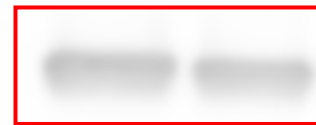

S6

NT2197  
ETFDH KO

DMSO

Torin1

100 —  
75 —  
63 —

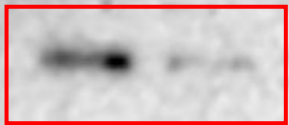

BCL-6

Supplement: fig5-data1 [file Figure 5B - source data 1.pdf › Figure 5 - source data 1/Figure 5B - source data 1/Figure 5B - source data 1.pdf]

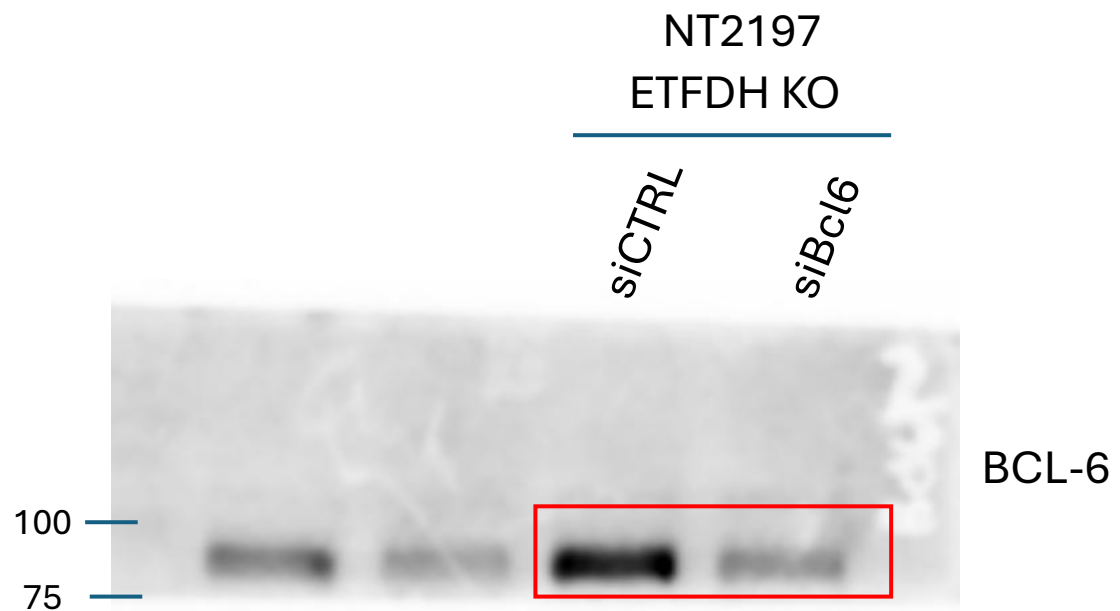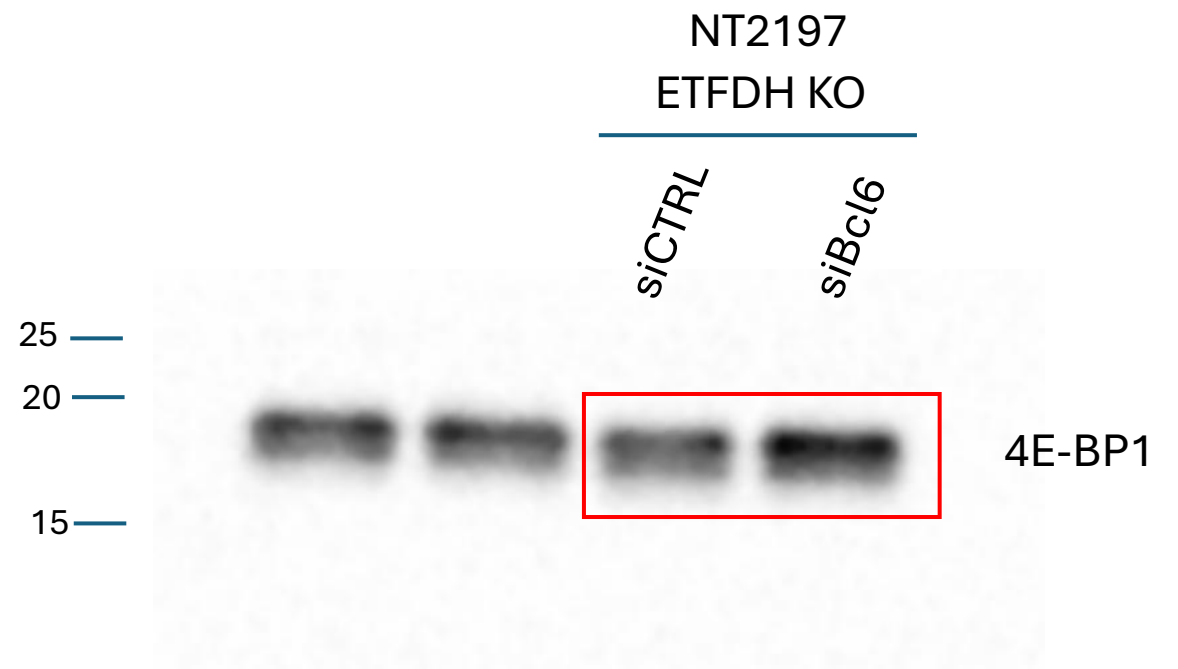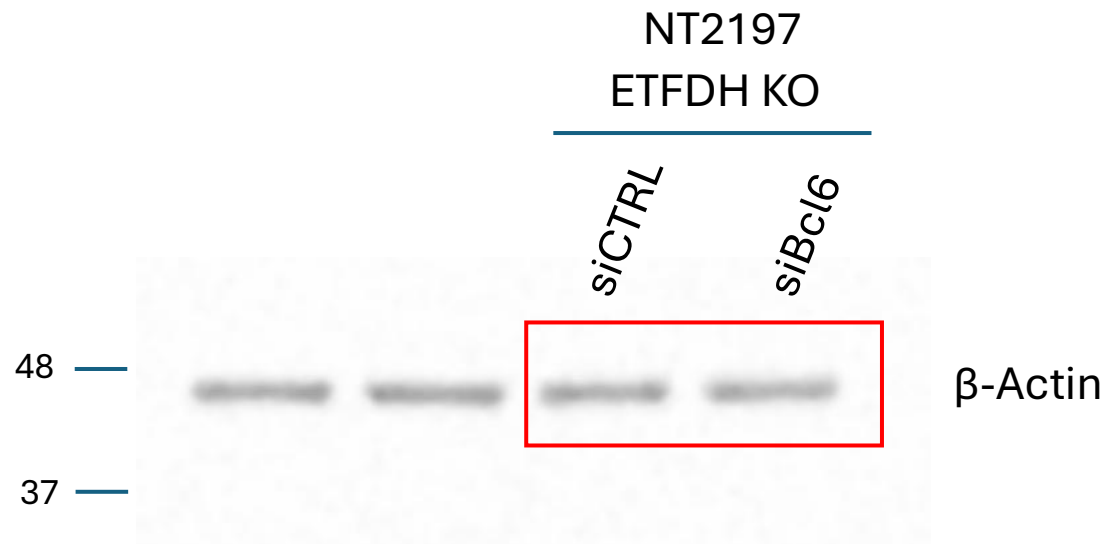

Supplement: fig5-data1 [file Figure 5G - source data 1.pdf › Figure 5 - source data 1/Figure 5G - source data 1/Figure 5G - source data 1.pdf]

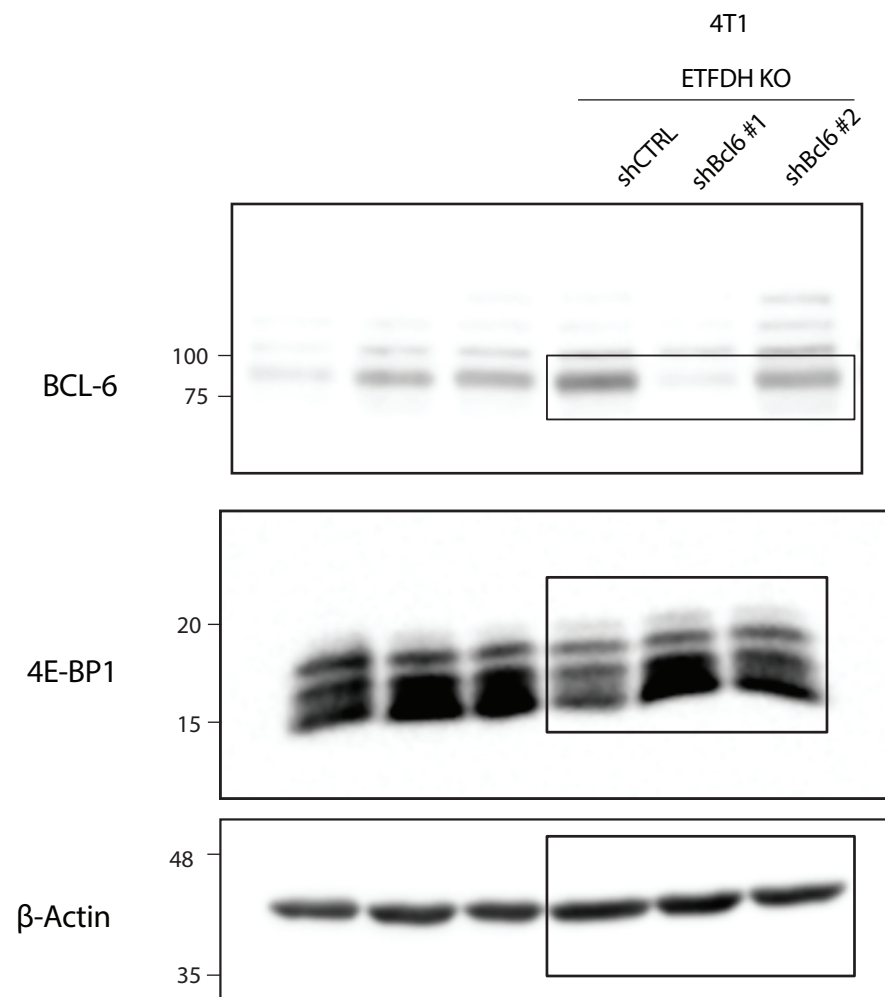

Supplement: fig5-data1 [file Figure 5H - source data 1.pdf › Figure 5 - source data 1/Figure 5H - source data 1/Figure 5H - source data 1.pdf]

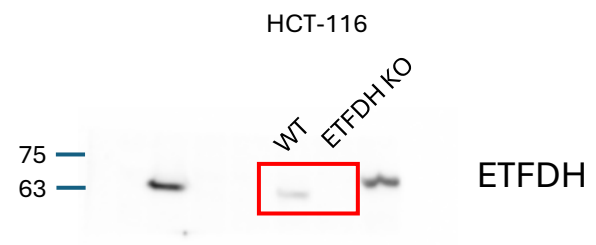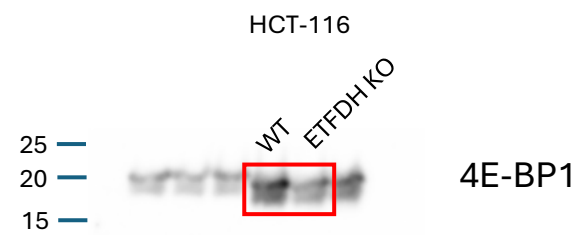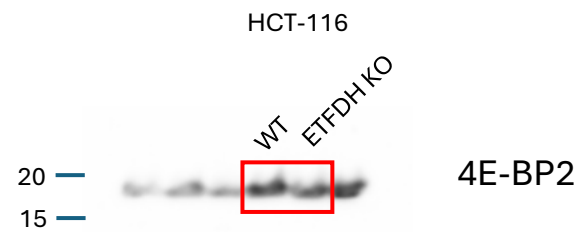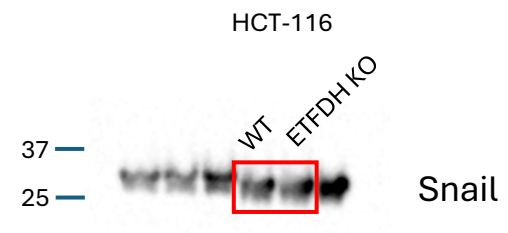

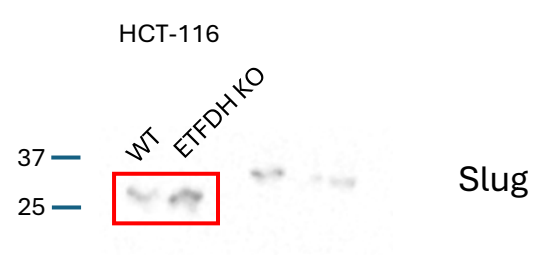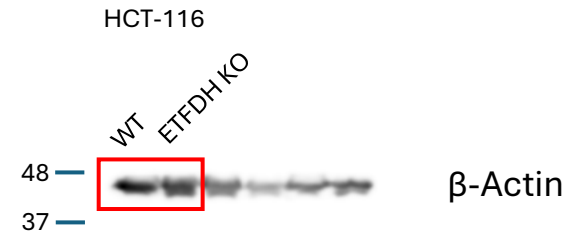

Supplement: fig5-figsupp1-data1 [file Figure 5-figure supplement 1A - source data 1.pdf › Figure 5-figure supplement 1 - source data 1/Figure 5-figure supplement 1A - source data 1/Figure 5-figure supplement 1A - source data 1.pdf]

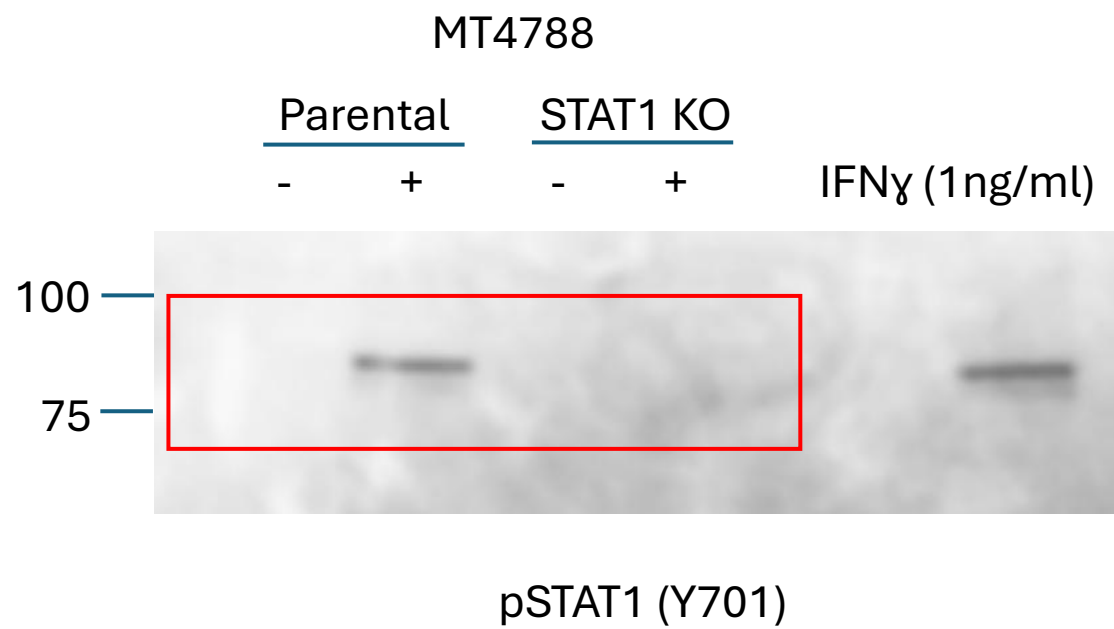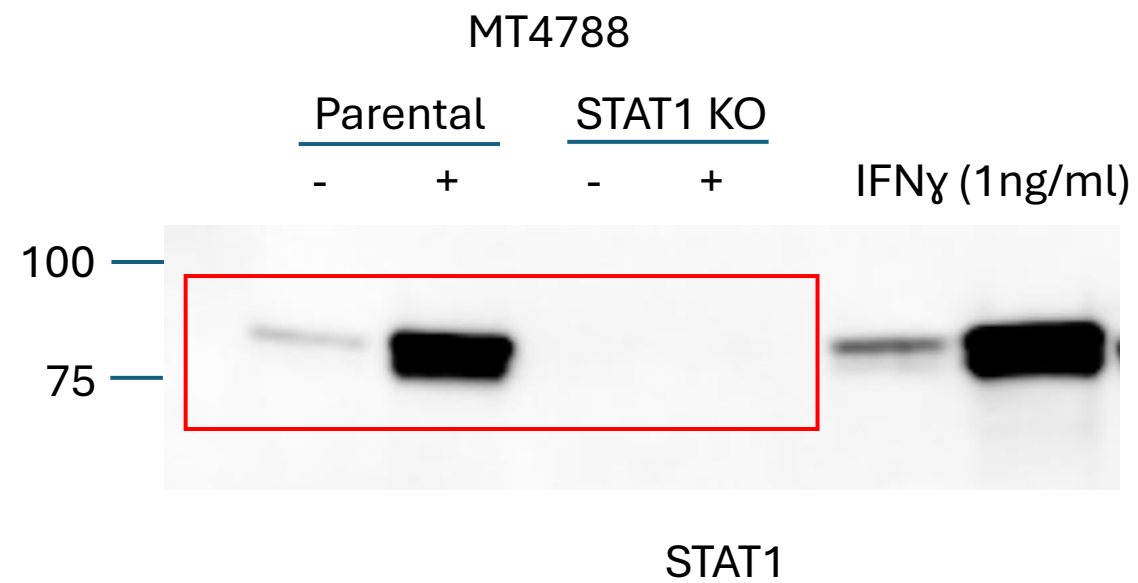

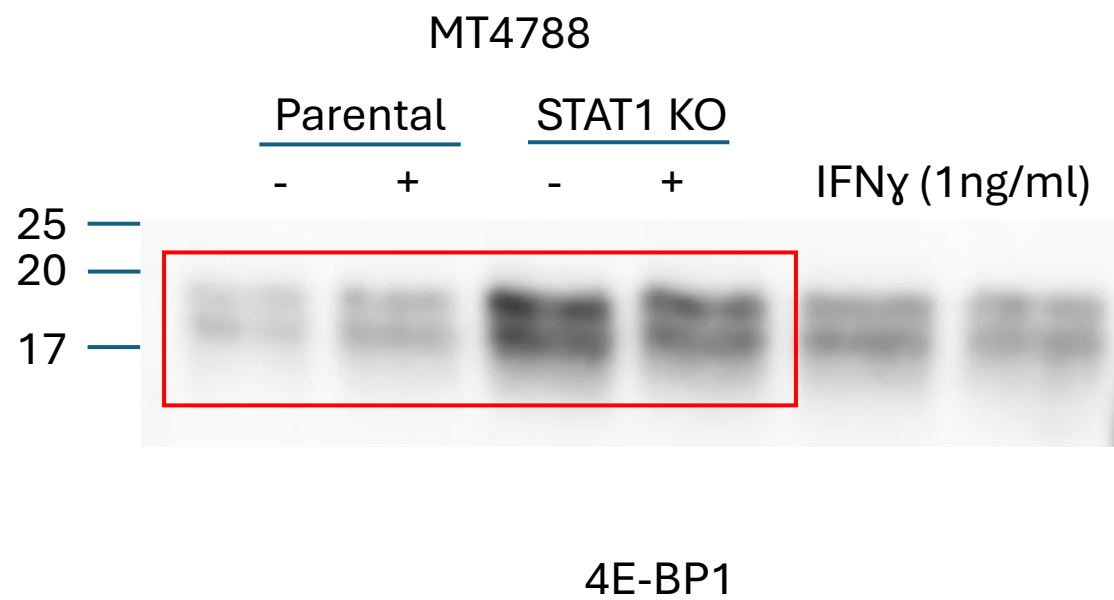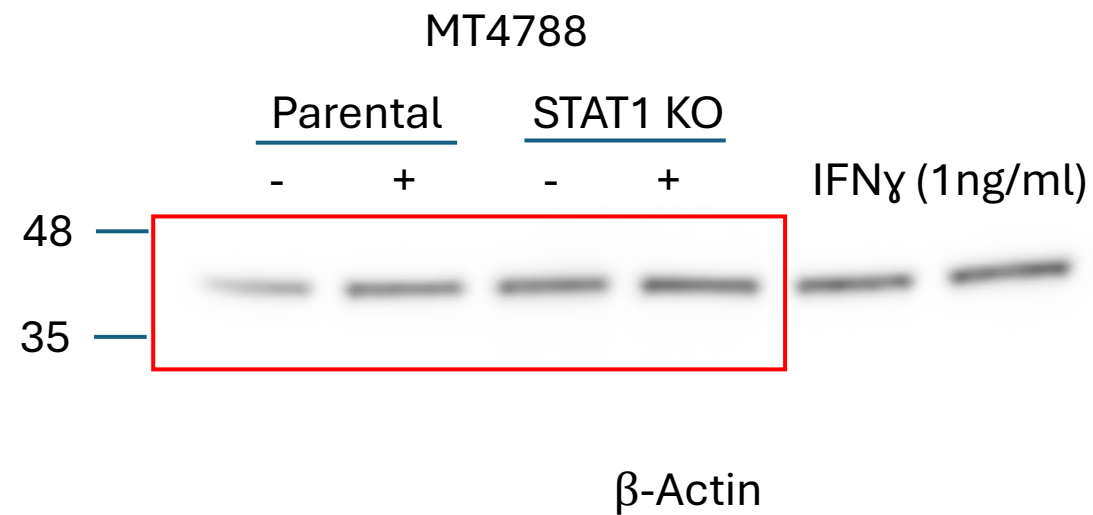

Supplement: fig5-figsupp1-data1 [file Figure 4-figure supplement 1B - source data 1.pdf › Figure 5-figure supplement 1 - source data 1/Figure 5-figure supplement 1B - source data 1/Figure 4-figure supplement 1B - source data 1.pdf]

HCT-116

WT    ETFDH KO

ETFDH

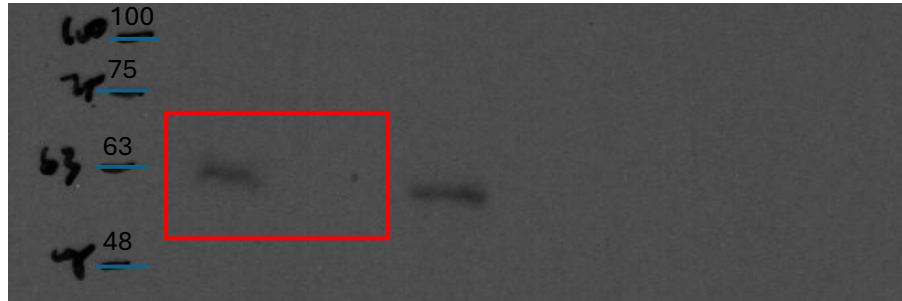

HCT-116

WT    ETFDH KO

STAT1

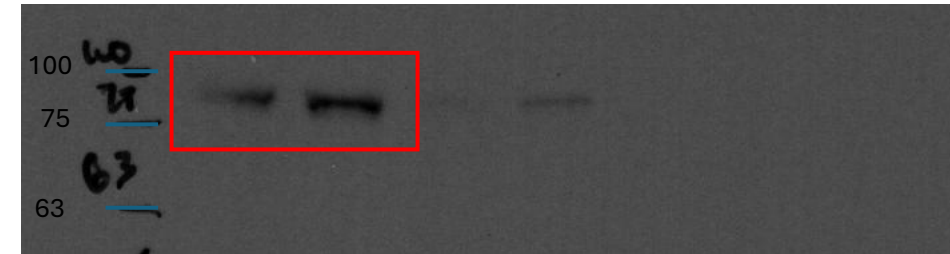

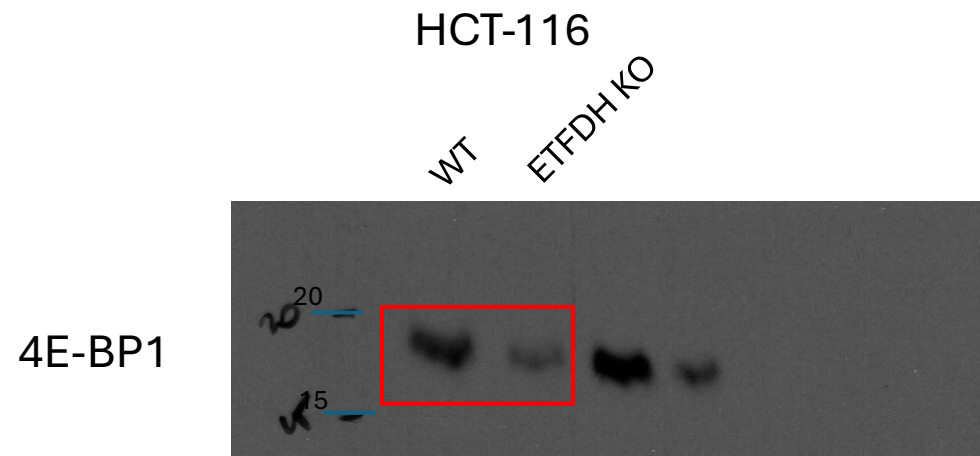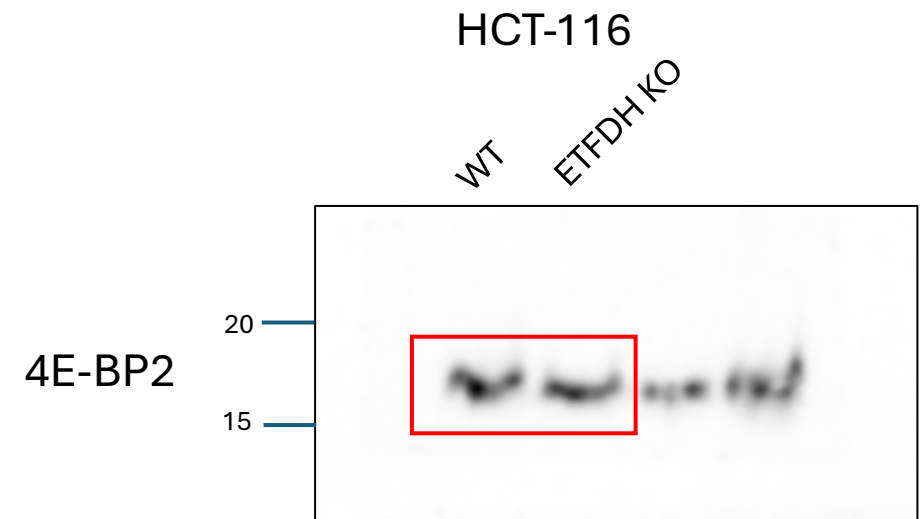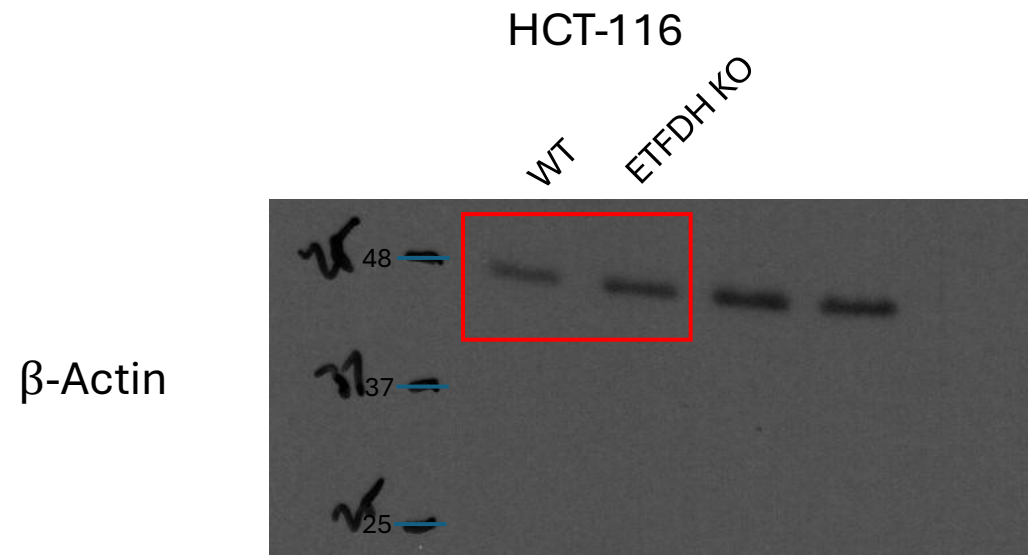

Supplement: fig5-figsupp1-data1 [file Figure 5-figure supplement 1C - source data 1.pdf › Figure 5-figure supplement 1 - source data 1/Figure 5-figure supplement 1C - source data 1/Figure 5-figure supplement 1C - source data 1.pdf]

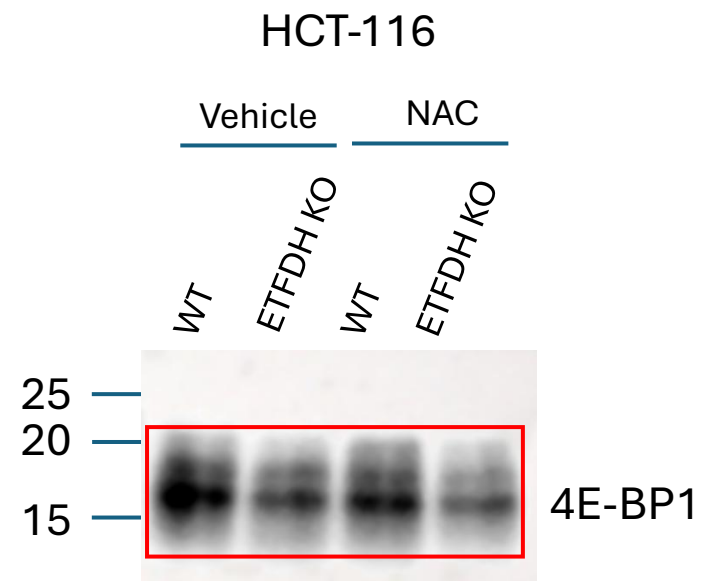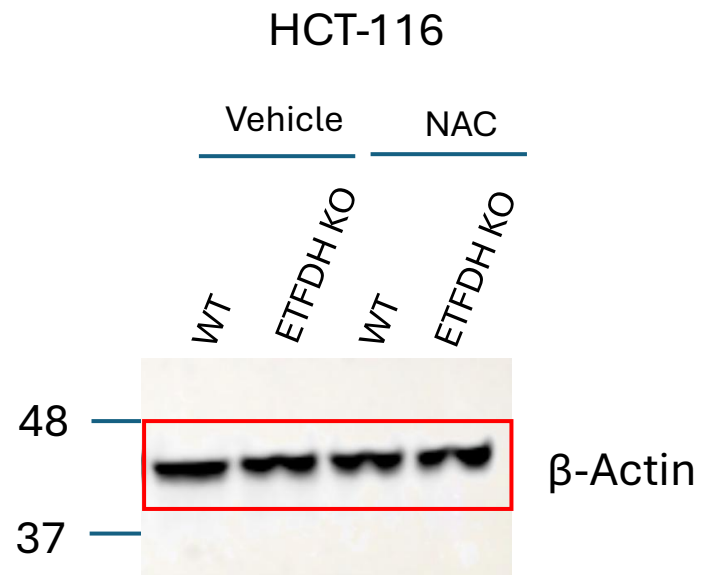

Supplement: fig5-figsupp1-data1 [file Figure 5-figure supplement 1G - source data 1.pdf › Figure 5-figure supplement 1 - source data 1/Figure 5-figure supplement 1G - source data 1/Figure 5-figure supplement 1G - source data 1.pdf]

## ETFDH

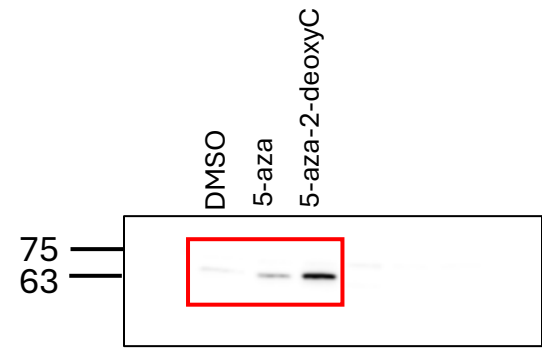

## $\beta$ -Actin

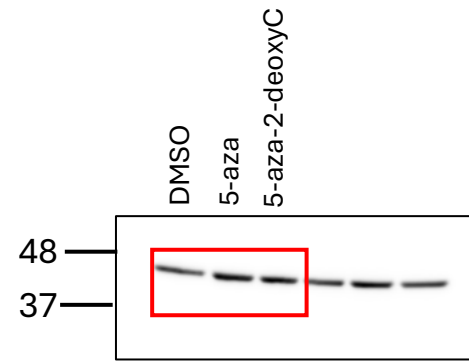

Supplement: fig6-data1 [file Figure 6B - source data 1.pdf › Figure 6 - source data 1/Figure 6B - source data 1/Figure 6B - source data 1.pdf]

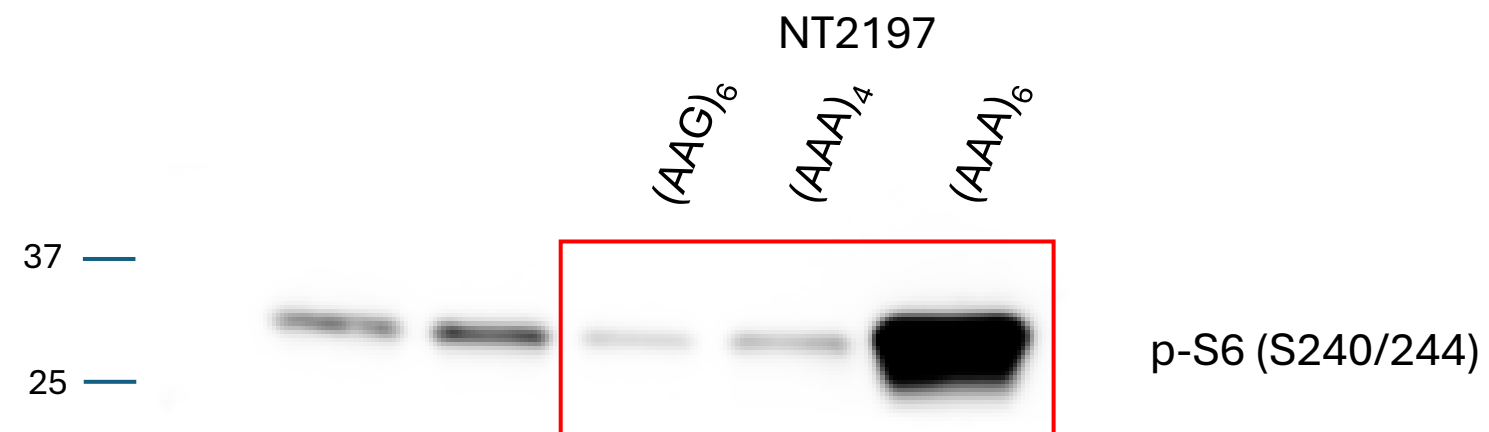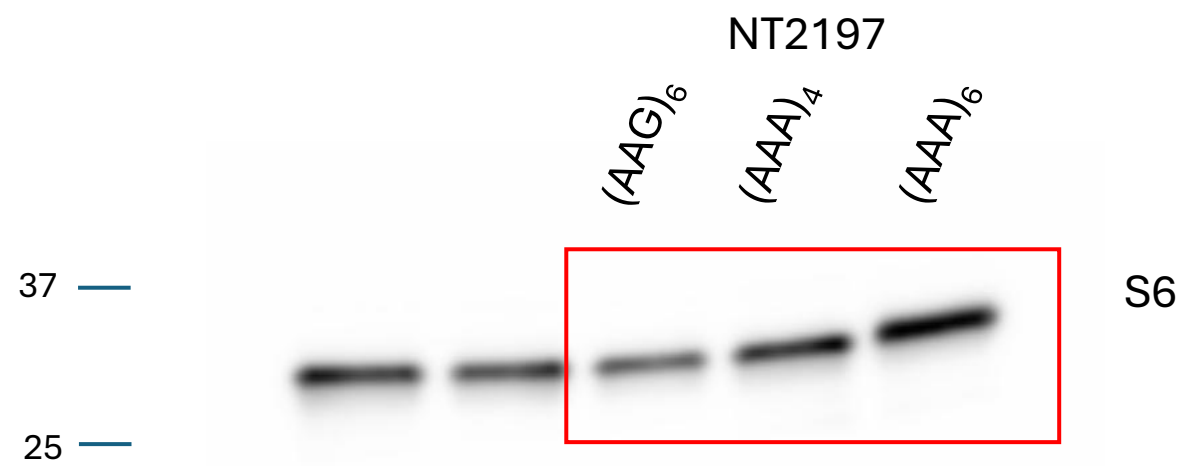

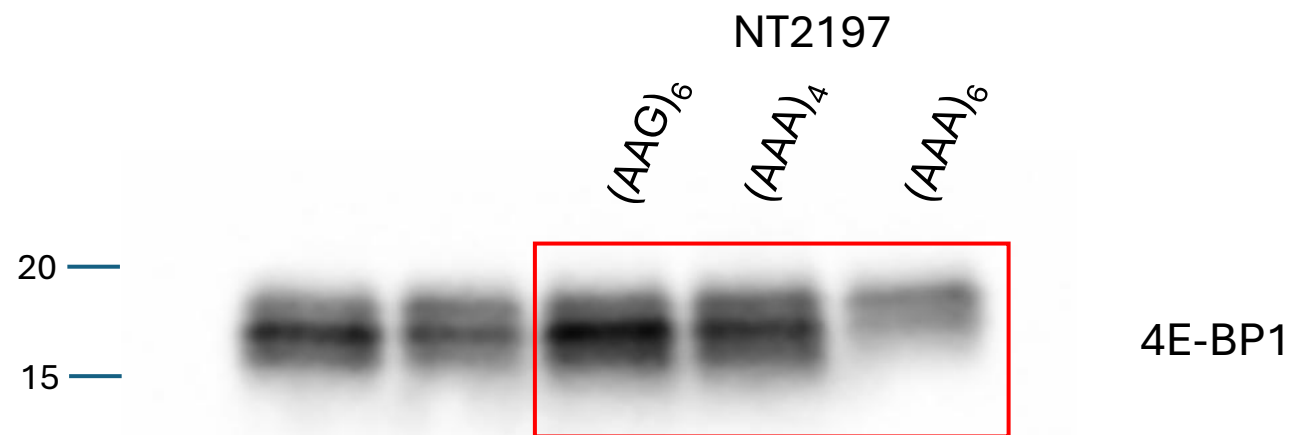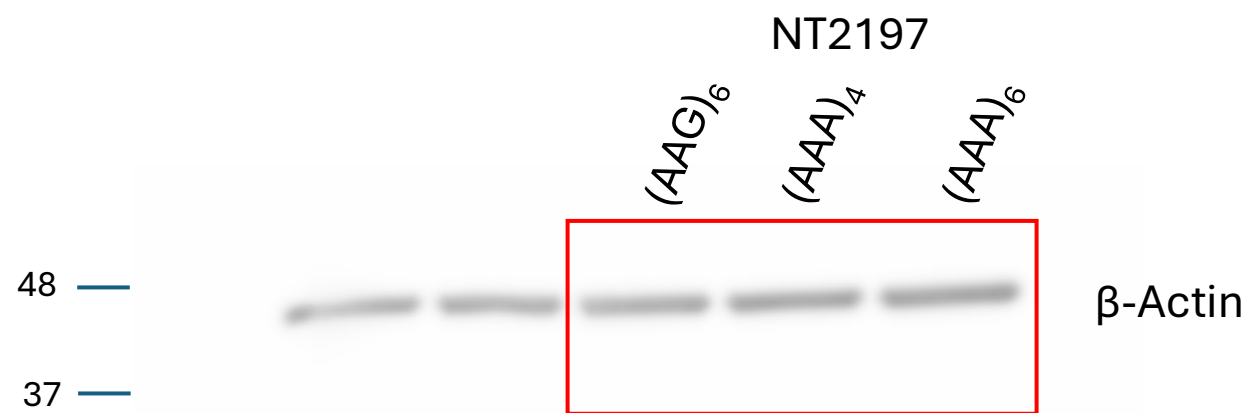

NT2197

$(AAG)_6$

$(AAA)_4$

$(AAA)_6$

20

15

4E-BP2

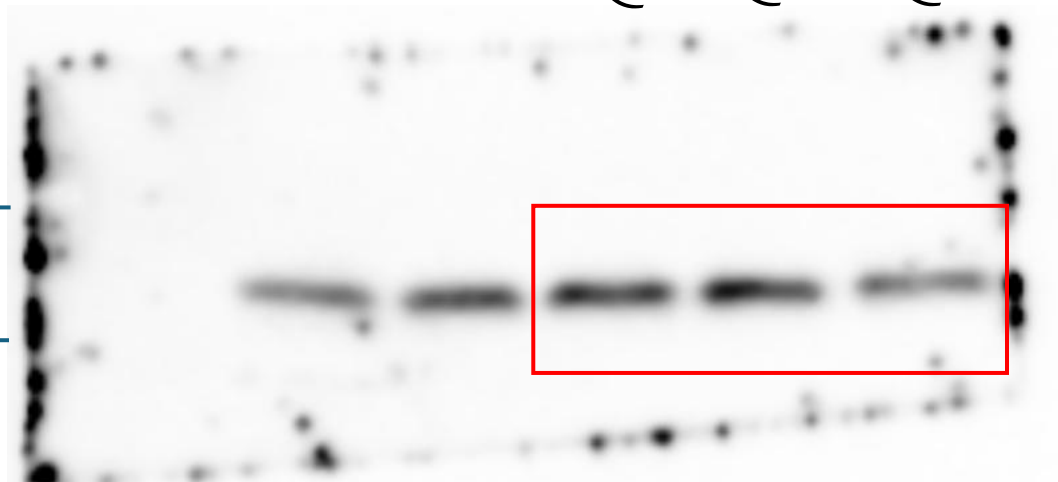

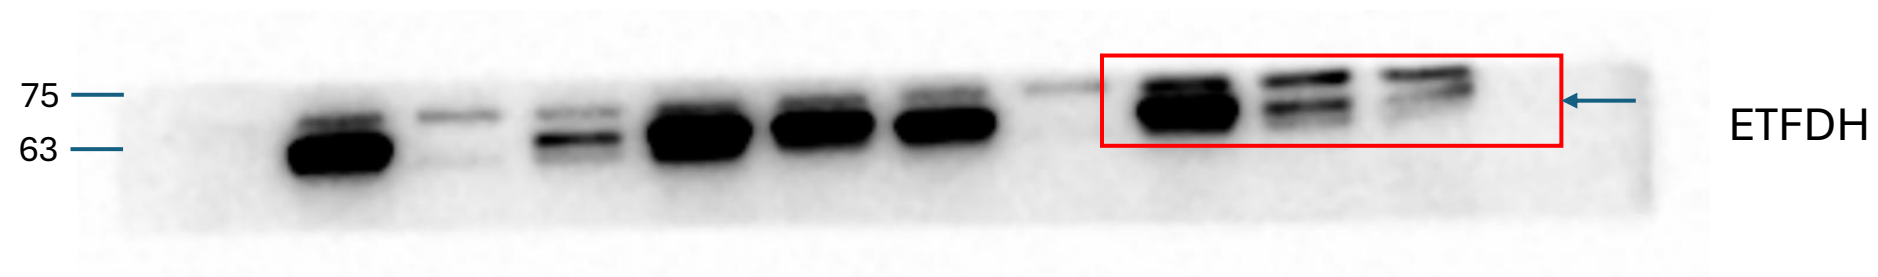

NT2197

(AAG)<sub>6</sub>

(AAA)<sub>4</sub>

(AAA)<sub>6</sub>

100 —  
75 —

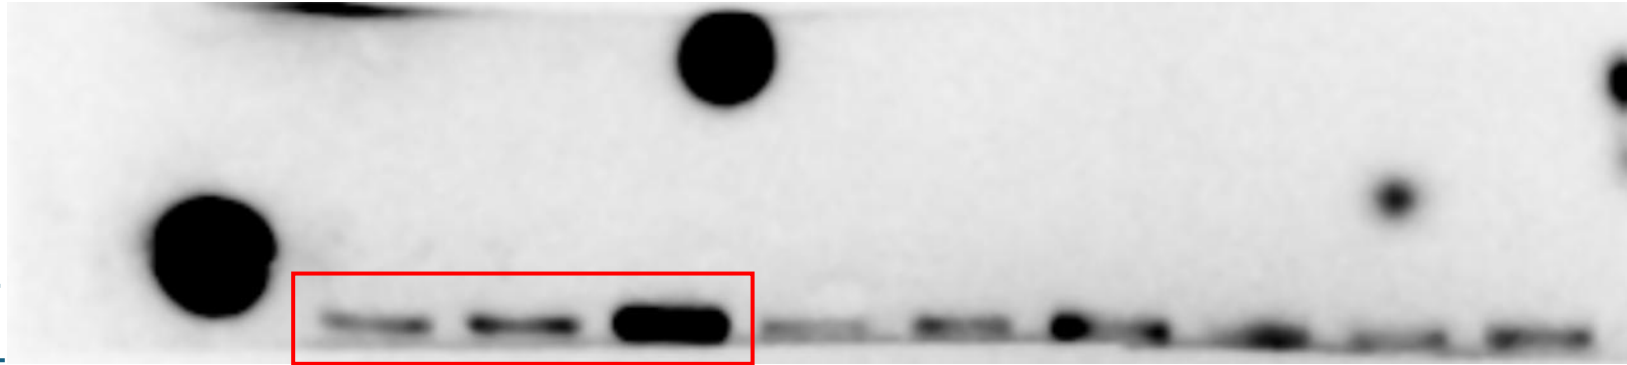

BCL-6

Supplement: fig6-data1 [file Figure 6C - source data 1.pdf › Figure 6 - source data 1/Figure 6C - source data 1/Figure 6C - source data 1.pdf]

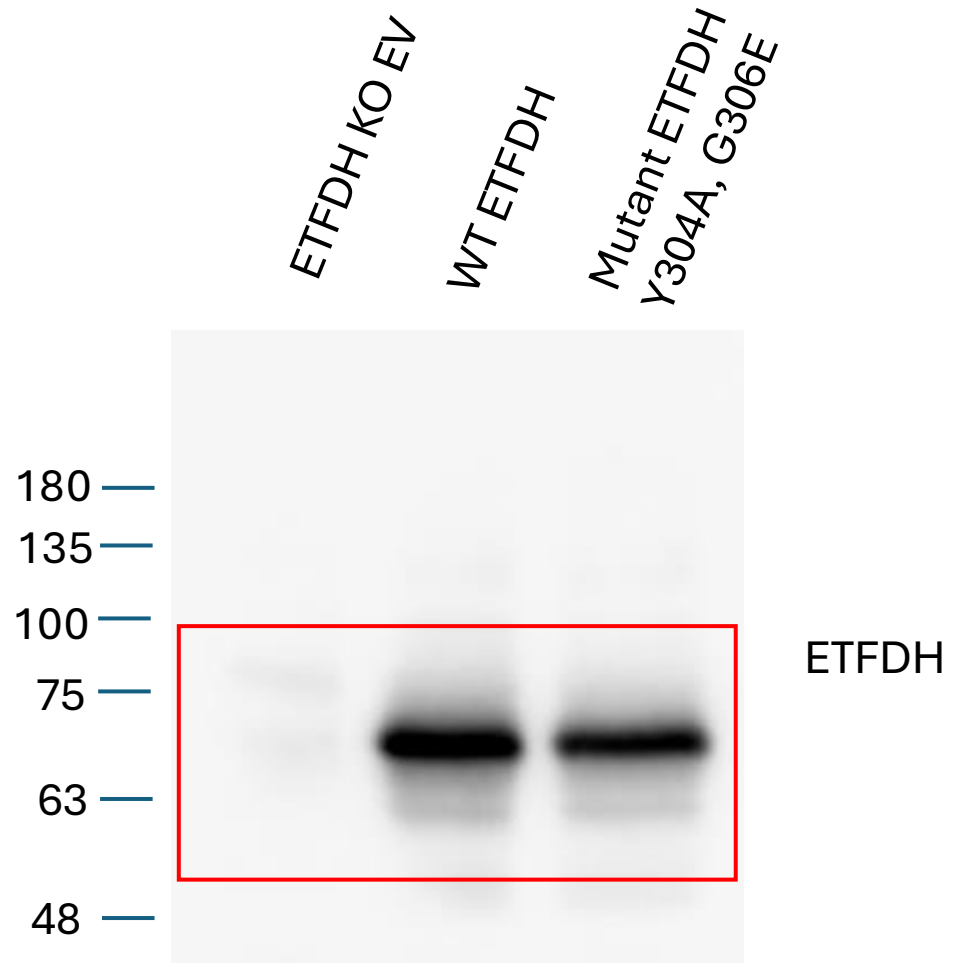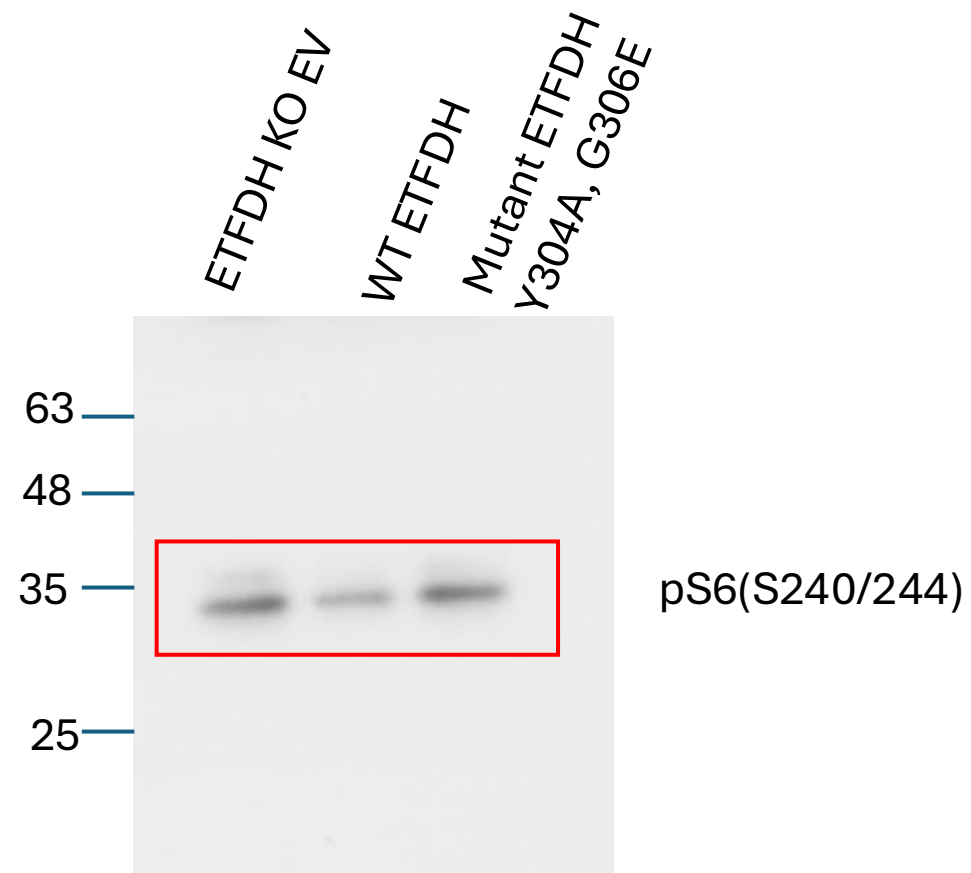

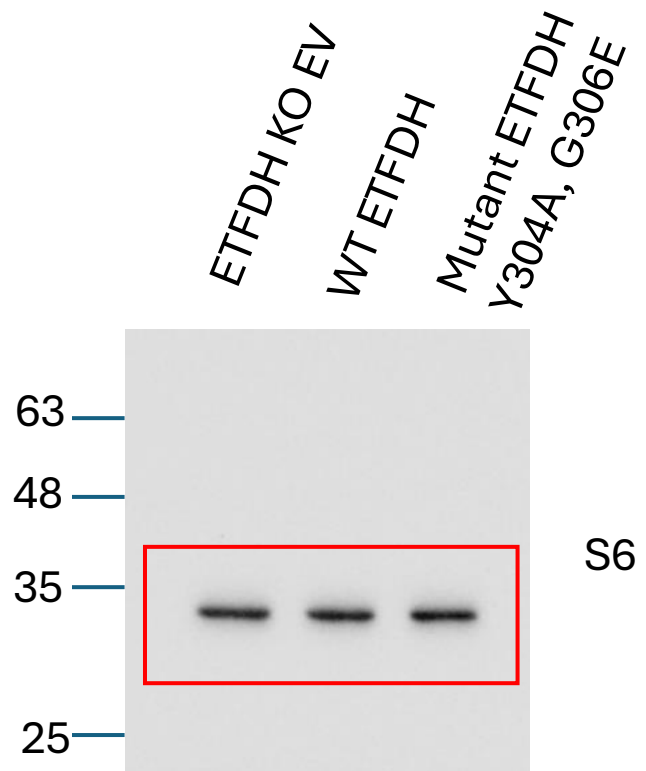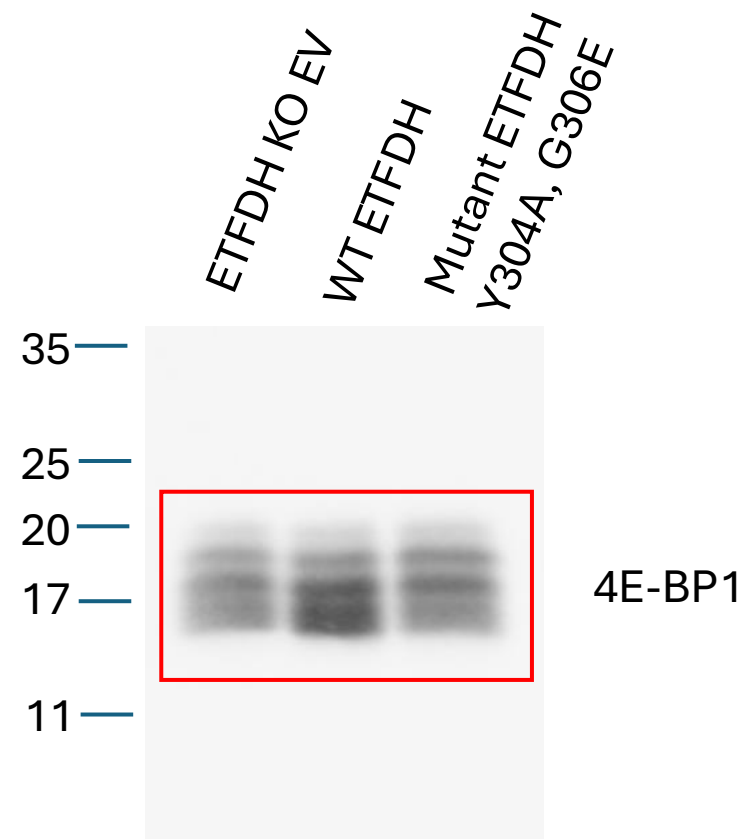

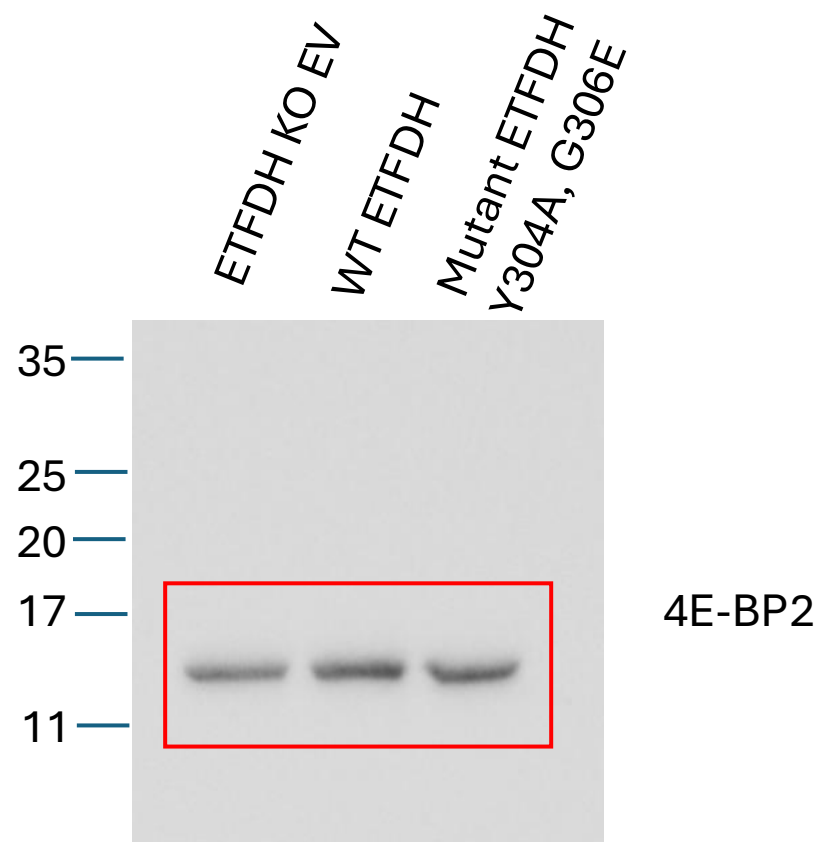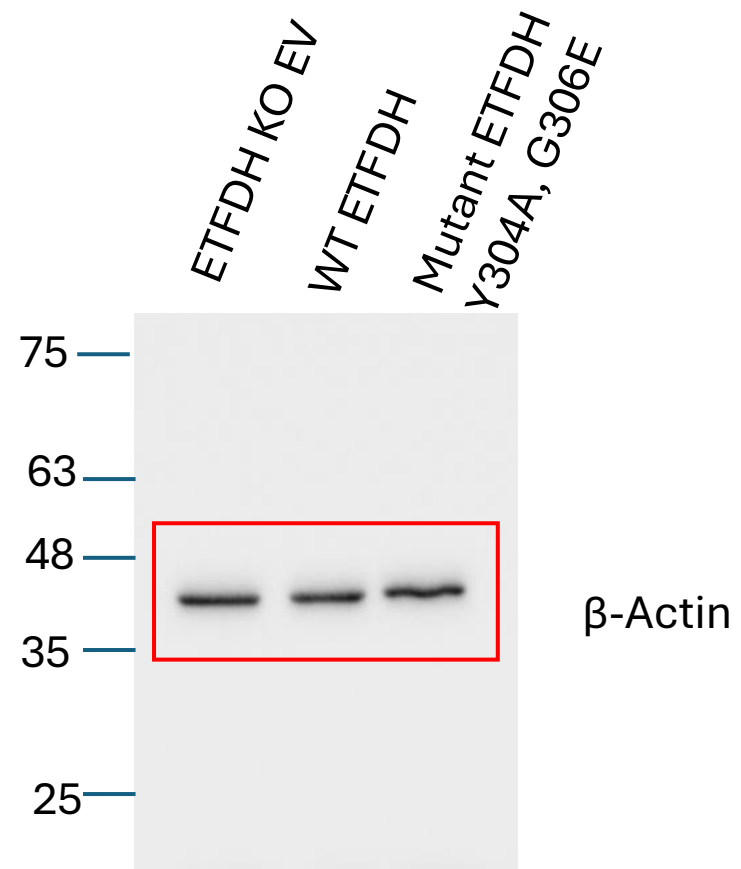

Supplement: fig6-figsupp1-data1 [file Figure6-figure supplement 1C - source data 1.pdf › Figure 6-figure supplement 1 - source data 1/Figure 6-figure supplement 1C - source data 1/Figure6-figure supplement 1C - source data 1.pdf]
